# Supplementary material
Source: Springer Nature journal article supplement (https://www.springermedizin.de/resource/supplementary/13014_2012_815_MOESM3_ESM.pdf/9634750)
Supplement: MOESM3 [file 9634750]

# COMORBIDITY CODING BOOK

Prepared by:

Jay F. Piccirillo, MD, FACS  
Amy Johnston, BS  
Peter Claybour, BA  
Benjamin Littenberg, MD  
Cynthia Creech, CTR  
Scott Anderson, CTR  
Lori Grove, CTR  
Irene Costas, BS, MPH

Washington University School of Medicine  
Department of Otolaryngology – Head and Neck Surgery  
Clinical Outcomes Research Office  
Campus Box 8115  
517 South Euclid Avenue  
St. Louis, MO 63110  
Academic Office: 314-362-7394  
<http://oto.wustl.edu/clinepi/outcomes.htm>

Research supported in part by grants from the  
National Cancer Institute  
Cancer Education Program  
<https://www-commons.cit.nih.gov/crisp/>

|                                                                 |           |
|-----------------------------------------------------------------|-----------|
| <b>INTRODUCTION</b>                                             | <b>3</b>  |
| <b>SELECTED REFERENCES</b>                                      | <b>4</b>  |
| <b>GENERAL GUIDELINES FOR CODING COMORBIDITY</b>                | <b>5</b>  |
| <b>AMBIGUOUS TERMINOLOGY</b>                                    | <b>8</b>  |
| <b>ADULT COMORBIDITY EVALUATION-27</b>                          | <b>9</b>  |
| <b>CODING OF INDIVIDUAL DISEASES, CONDITIONS, AND ILLNESSES</b> | <b>13</b> |
| <b>CARDIOVASCULAR SYSTEM</b>                                    | <b>13</b> |
| <b>RESPIRATORY SYSTEM</b>                                       | <b>18</b> |
| <b>GASTROINTESTINAL SYSTEM</b>                                  | <b>20</b> |
| <b>RENAL SYSTEM</b>                                             | <b>23</b> |
| <b>ENDOCRINE SYSTEM</b>                                         | <b>24</b> |
| <b>NEUROLOGICAL SYSTEM</b>                                      | <b>25</b> |
| <b>PSYCHIATRIC</b>                                              | <b>27</b> |
| <b>RHEUMATOLOGIC</b>                                            | <b>28</b> |
| <b>IMMUNOLOGICAL SYSTEM</b>                                     | <b>29</b> |
| <b>MALIGNANCY</b>                                               | <b>30</b> |
| <b>SUBSTANCE ABUSE</b>                                          | <b>36</b> |
| <b>BODY WEIGHT</b>                                              | <b>37</b> |
| <b>SCENARIOS</b>                                                | <b>38</b> |
| <b>INDEX OF ABBREVIATIONS OF PROCEDURES AND DISEASES</b>        | <b>54</b> |
| <b>PARTIAL DRUG LIST</b>                                        | <b>59</b> |

## **INTRODUCTION**

Patients with cancer often have other diseases, illnesses, or conditions in addition to their index cancer. These other conditions are generally referred to as comorbidities. Although not a feature of the cancer itself, comorbidity is an important attribute of the patient. Survival rates are lower for patients with a greater number and severity of comorbid conditions. Comorbidity also has direct impact on the care of patients, selection of initial treatment, and evaluation of treatment effectiveness. When reporting statistical survival data, hospital-based and national cancer registries do not routinely take into account these coexisting medical ailments.

The goal of this coding book is to assist in the education and training of Certified Tumor Registrars and other individuals dedicated to collecting and reporting information on patients with cancer. This book should be used in association with the videotape, "The Whole Picture: Coding Comorbidity," which may be obtained from the Clinical Outcomes Research Office. The coding book should also serve as a resource to answer questions and to guide continued accurate and valid collection of comorbid information. We are most interested in all comments from users of this coding book so we may improve this work for future users.

We are currently developing a web-based version of this education program. We believe this web-based version should be of great value in training cancer registrars and other individuals to code comorbidity from the medical records of patients with cancer. When completed (approximately April-May, 2003), this web course may be accessed through the Clinical Outcomes Research Office website <http://oto.wustl.edu/clinepi>.

Jay F. Piccirillo, MD  
Benjamin Littenberg, MD  
Cynthia Creech, CTR  
Lori Grove, CTR  
Amy Johnston, BS  
Peter Claybour, BA  
Irene Costas, BS, MPH

St. Louis, Missouri  
September 2002

## **SELECTED REFERENCES**

1. Piccirillo JF. Inclusion of Comorbidity in a Staging System for Head and Neck Cancer. *Oncology*. 1995 9(9):831-836.
2. Piccirillo JF, Feinstein AR. Clinical Symptoms and Comorbidity: Significance for the Prognostic Classification of Cancer. *Cancer*. 1996; 77:834-842.
3. Pugliano FA, Piccirillo JF. The Importance of Comorbidity in Staging Upper Aerodigestive Tract Cancer. *Current Opinion Otolaryngology Head Neck Surgery*. 1996; 4:88-93.
4. Piccirillo JF, Creech CM, Zequeira R, Anderson S, Johnston AS. Inclusion of Comorbidity into Oncology Data Registries. *Journal of Registry Management* 1999;26:66-70.
5. Piccirillo JF. Importance of Comorbidity in Head and Neck Cancer. *Laryngoscope*. 2000; 110(4):593-602.
6. Johnston, AS, Piccirillo JF, Creech C, Littenberg B, Jeffe D, Spitznagel EL. Validation of a Comorbidity Education Program. *Journal of Registry Management* 2001; 28: 125-131.
7. Piccirillo JF, Costas I, Claybour P, Borah AJ, Grove L. The Measurement of Comorbidity by Cancer Registries. *Journal of Registry Management* (accepted for publication)

# **GENERAL GUIDELINES FOR CODING COMORBIDITY**

## **Definition**

Comorbidity refers to any co-existing medical ailment not related to the index cancer. For example, in a patient with prostate cancer, congestive heart failure would be considered a comorbidity. Any medical ailment related to the cancer should not be considered comorbidity. For example, in a patient with hepatic carcinoma, portal hypertension with ascites would not be considered a comorbidity. Instead, the portal hypertension is a manifestation of the hepatic carcinoma. In this particular case, the patient has ascites because of portal hypertension related to the hepatic tumor and the ascites cannot be considered a comorbidity.

## **Time of Assessment**

- Comorbidity will be classified based on the illness(es) **present at or before the date of diagnosis** (also referred to as **zero-time** in this document). Any other illness(es) referred to in the chart which are diagnosed after the diagnosis of the index cancer should not be considered comorbid condition(s). If a comorbid condition is detected from laboratory tests or diagnostic medical work-up during the hospital admission for diagnosis and/or initial treatment of the index cancer, code the comorbid condition as a comorbidity. If a complication of the cancer or its treatment occurs (e.g., post-operative myocardial infarction), do not code the complication as a comorbid condition.

## **Guidelines for Severity Score**

- The degree of decompensation of **Individual** comorbid ailments should be classified as Grade 1 (Mild Decompensation), Grade 2 (Moderate Decompensation), or Grade 3 (Severe Decompensation).
- The **Overall Comorbidity Severity Score** (Mild, Moderate, or Severe) is defined according to the highest ranked single ailment, except when two or more Grade 2 ailments occur in different organ systems. In this case, the comorbid overall severity score should be designated as a **Severe**.

For example, three Grade 1 illnesses in different organ systems (chronic bronchitis treated with medication, well-controlled hypertension, and diabetes controlled by oral agents alone) would still be coded as an Overall Comorbidity Score of Mild or Grade 1. On the other hand, congestive heart failure more than 6 months ago and portal hypertension without complications, (two Grade 2 comorbidities in different organ systems) would have an Overall Comorbidity Severity Score of Severe or Grade 3.

## Key Points

- If a medical condition is not listed on the ACE-27 comorbidity form or in this coding book, do not code it as comorbidity.

Examples: anemia and gout

- In the case of ambiguity between grades of comorbidity for a single condition, always select the least severe grade.
- If you know a comorbidity exists, however it does not exactly match the definition on the comorbidity form, it is important that you capture this information rather than exclude it because it does not fit perfectly.

Example: Grade 1 Respiratory is defined as "Restrictive Lung Disease or COPD (chronic bronchitis, emphysema, or asthma) with dyspnea which has responded to treatment." The medical record states the patient has chronic emphysema but does not indicate whether there is dyspnea or whether there has been a response to treatment. In this case, you would indicate that the patient has a Grade one Respiratory comorbidity.

- Similarly, within a grade for a single condition, there may be two options given but you are unsure which option to check. In this case, rather than record neither comorbidity option, you would record the comorbidity which most closely matches the condition described in the medical record.
- Do not try to assign a comorbidity based solely on the medications that the patient is taking. Only code the comorbidity if the disease itself is mentioned in the medical record.

Example: A patient may be taking an anti-depressant but without mention of depression. In this case, do not code **Depression**. The patient may be taking the medication for other reasons (e.g., to induce weight loss).

- Unless otherwise specified, the terms "acute" and "recent" refer to events less than or equal to six months prior to the time of diagnosis. The terms "chronic" and "old" refer to events greater than six months prior to the time of diagnosis.

## Key Points, continued

- A transplant (kidney, liver, lung or heart) is not comorbidity. Rather, it is an indication of the severity AND irreversibility of the index medical condition.

Examples: A 62 year old male hospitalized for congestive heart failure and subsequent heart transplant greater than 6 months prior to diagnosis would receive a Grade of 2 for "Hospitalized for CHF greater than 6 months prior." Similarly, a 59 year old female with acute kidney transplant rejection who is on dialysis at the time of diagnosis would receive a Grade of 2 for "Acute dialysis."

- Toxic Exposure. Exposure to toxic agents should not be coded as a comorbidity. Many toxic agents such as radiation, ethylene oxide, and asbestos have been implicated in the **pathogenesis** of human cancers. Unfortunately, it is usually difficult to quantify the exact amount of exposure and assess the relative contribution of such exposure to the existence of comorbid conditions in cancer patients.

## **AMBIGUOUS TERMINOLOGY**

### **Terms That Constitute a Diagnosis of Comorbid Ailment**

Interpret the following terms as a diagnosis of comorbid ailment.

- Compatible with
- Consistent with
- Most likely
- Presumably
- Probable
- Suspect
- Suspicious

*Example:* Medical record states: "CXR was consistent with COPD. Patient refused further work-up." "Patient's history and physical are compatible with a diagnosis of myocardial infarction pending test results."

### **Terms That Do Not Constitute a Diagnosis of Comorbid Ailment**

Do not interpret the following terms as a diagnosis of comorbid ailment. Do not include patients who have a diagnosis consisting only of these terms.

- Equivocal
- Possible
- Questionable
- "Claims to be"
- Suggests
- Worrisome
- Rule Out

*Example:* Admitting diagnosis is reported as: "possible myocardial infarct."



## **ADULT COMORBIDITY EVALUATION-27**

The Kaplan-Feinstein Index<sup>1</sup> (KFI) was originally developed by Morrison Kaplan and Alvan Feinstein in 1974. Drs. Jay Piccirillo and Benjamin Littenberg modified this instrument to form the Adult Comorbidity Evaluation-27. The KFI was modified for two important reasons. First, the KFI does not list diabetes as a comorbid ailment since the KFI was developed from the study of a cohort of patients with diabetes (index disease). Diabetes is a common condition and could impact on outcomes for patients with cancer and so it was included as a cogent comorbid ailment in the ACE-27. Second, the KFI did not include several other important conditions, such as deep vein thrombosis; heart, lung, liver, and kidney transplants; paraplegia; Multiple Sclerosis, Parkinson's disease, Myasthenia Gravis, dementia, schizophrenia, bipolar disorder, depression, AIDS, substance abuse, and morbid obesity. Drs. Piccirillo, Littenberg, and colleagues sought advice from clinical experts and, when possible, the published literature to assign levels of comorbidity to the ailments not included in the original instrument.

### **Validation of the ACE-27**

The medical records of 190 patients of Barnes-Jewish Hospital were selected for detailed review and assessment of the performance of the ACE-27 comorbidity index. The patients were selected to ensure a broad representation of tumor sites and severity of comorbidity levels. Comorbidity, using the ACE-27, was classified without knowledge of the KFI score. The study population of 190 patients consisted of 98 (52%) women, 149 (78%) Caucasians, and the mean (SD) age was 64.3 (13.0). The overall two-year survival rate was 113/190 (60%).

The reviewers included (A) a first year medical student and (B) a trained research assistant from the Clinical Outcomes Research Office who trained registrars to code comorbidity for approximately one year. Of the 190 selected charts, Observer A reviewed all 190 while Observer B reviewed 112 charts twice, with a 5-month interval between reviews. Due to misclassification of the primary tumor site, three charts were excluded from the sample. The Weighted Kappa Statistic was used to assess interobserver and intraobserver reliability, and the statistical significance criterion was set at 0.05.

Significant agreement between the independent observers was noted with a Weighted Kappa of 0.80 (95%CI, 0.72,0.88). Intraobserver reliability was also significant with a Weighted Kappa of 0.93 (95%CI, 0.88,0.98). Kappa measurements which are greater than 0.75 indicate excellent reproducibility.

---

<sup>1</sup> Kaplan, Feinstein. *J Chron Dis.* 1974;27:387-404

## Prognostic Validity of the ACE-27

Between the years of 1999-2001, the Clinical Outcomes Research Office has received 7,697 completed ACE-27 forms for newly diagnosed (analytic) cancer patients presenting at six nationwide participating medical centers. Of these forms, detailed demographic, tumor, and follow-up information has been electronically received from the participating medical centers for the first 3,326 patients.

The prognostic impact of comorbidity on survival is shown in Figure 1. As can be seen, there is a strong prognostic impact of comorbidity on survival (Log Rank  $\chi^2 = 195.24$ ;  $p < 0.0001$ ). At any point in time, patients with more severe levels of comorbidity have worse survival.

**FIGURE 1: Impact of Comorbidity on Survival**  
**N=3,326**

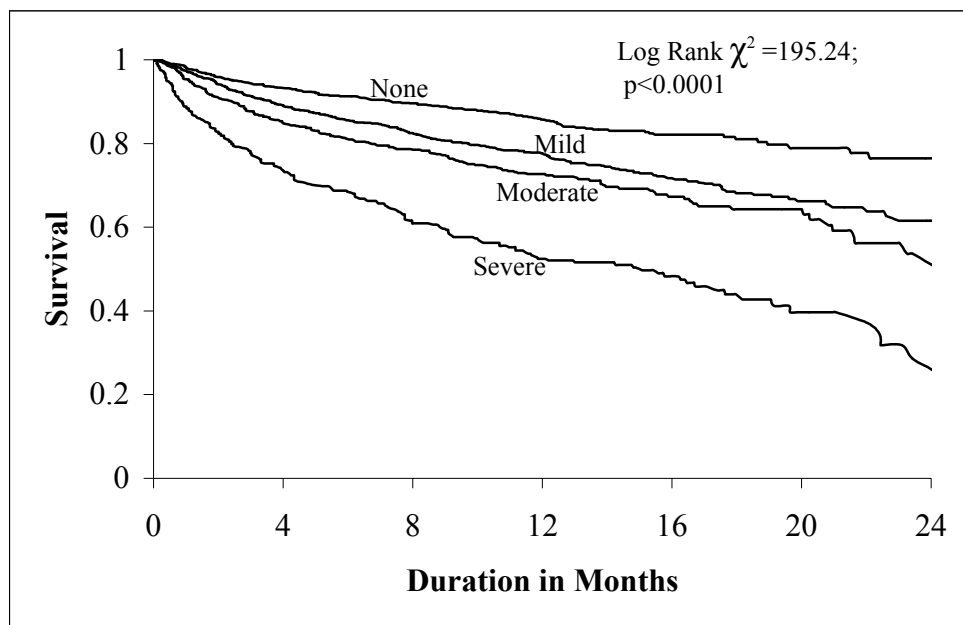

Date \_\_\_\_\_  
 Coder's Initials \_\_\_\_\_  
 Oncology Center \_\_\_\_\_  
 Accession # \_\_\_\_\_

## Adult Comorbidity Evaluation-27

Identify the important medical comorbidities and grade severity using the index.  
 Overall Comorbidity Score is defined according to the highest ranked single ailment,  
 except in the case where two or more Grade 2 ailments occur in different organ systems.  
 In this situation, the overall comorbidity score should be designated Grade 3.

| Cogent comorbid ailment          | Grade 3<br>Severe Decompensation                                                                                                                                                                                                                                                                                                                                                                                       | Grade 2<br>Moderate Decompensation                                                                                                                                                                                                                             | Grade 1<br>Mild Decompensation                                                                                                                                                                                                                                                                          |
|----------------------------------|------------------------------------------------------------------------------------------------------------------------------------------------------------------------------------------------------------------------------------------------------------------------------------------------------------------------------------------------------------------------------------------------------------------------|----------------------------------------------------------------------------------------------------------------------------------------------------------------------------------------------------------------------------------------------------------------|---------------------------------------------------------------------------------------------------------------------------------------------------------------------------------------------------------------------------------------------------------------------------------------------------------|
| <b>Cardiovascular System</b>     |                                                                                                                                                                                                                                                                                                                                                                                                                        |                                                                                                                                                                                                                                                                |                                                                                                                                                                                                                                                                                                         |
| Myocardial Infarct               | <input type="checkbox"/> MI ≤ 6 months                                                                                                                                                                                                                                                                                                                                                                                 | <input type="checkbox"/> MI > 6 months ago                                                                                                                                                                                                                     | <input type="checkbox"/> MI by ECG only, age undetermined                                                                                                                                                                                                                                               |
| Angina / Coronary Artery Disease | <input type="checkbox"/> Unstable angina                                                                                                                                                                                                                                                                                                                                                                               | <input type="checkbox"/> Chronic exertional angina<br><input type="checkbox"/> Recent (≤ 6 months) Coronary Artery Bypass Graft (CABG) or Percutaneous Transluminal Coronary Angioplasty (PTCA)<br><input type="checkbox"/> Recent (≤ 6 months) coronary stent | <input type="checkbox"/> ECG or stress test evidence or catheterization evidence of coronary disease without symptoms<br><input type="checkbox"/> Angina pectoris not requiring hospitalization<br><input type="checkbox"/> CABG or PTCA (>6 mos.)<br><input type="checkbox"/> Coronary stent (>6 mos.) |
| Congestive Heart Failure (CHF)   | <input type="checkbox"/> Hospitalized for CHF within past 6 months<br><input type="checkbox"/> Ejection fraction < 20%                                                                                                                                                                                                                                                                                                 | <input type="checkbox"/> Hospitalized for CHF >6 months prior<br><input type="checkbox"/> CHF with dyspnea which limits activities                                                                                                                             | <input type="checkbox"/> CHF with dyspnea which has responded to treatment<br><input type="checkbox"/> Exertional dyspnea<br><input type="checkbox"/> Paroxysmal Nocturnal Dyspnea (PND)                                                                                                                |
| Arrhythmias                      | <input type="checkbox"/> Ventricular arrhythmia ≤ 6 months                                                                                                                                                                                                                                                                                                                                                             | <input type="checkbox"/> Ventricular arrhythmia > 6 months<br><input type="checkbox"/> Chronic atrial fibrillation or flutter<br><input type="checkbox"/> Pacemaker                                                                                            | <input type="checkbox"/> Sick Sinus Syndrome                                                                                                                                                                                                                                                            |
| Hypertension                     | <input type="checkbox"/> DBP ≥ 130 mm Hg<br><input type="checkbox"/> Severe malignant papilledema or other eye changes<br><input type="checkbox"/> Encephalopathy                                                                                                                                                                                                                                                      | <input type="checkbox"/> DBP 115-129 mm Hg<br><input type="checkbox"/> DBP 90-114 mm Hg while taking antihypertensive medications<br><input type="checkbox"/> Secondary cardiovascular symptoms: vertigo, epistaxis, headaches                                 | <input type="checkbox"/> DBP 90-114 mm Hg while <u>not</u> taking antihypertensive medications<br><input type="checkbox"/> DBP <90 mm Hg while taking antihypertensive medications<br><input type="checkbox"/> Hypertension, not otherwise specified                                                    |
| Venous Disease                   | <input type="checkbox"/> Recent PE (≤ 6 mos.)<br><input type="checkbox"/> Use of venous filter for PE's                                                                                                                                                                                                                                                                                                                | <input type="checkbox"/> DVT controlled with Coumadin or heparin<br><input type="checkbox"/> Old PE > 6 months                                                                                                                                                 | <input type="checkbox"/> Old DVT no longer treated with Coumadin or Heparin                                                                                                                                                                                                                             |
| Peripheral Arterial Disease      | <input type="checkbox"/> Bypass or amputation for gangrene or arterial insufficiency < 6 months ago<br><input type="checkbox"/> Untreated thoracic or abdominal aneurysm (≥ 6 cm)                                                                                                                                                                                                                                      | <input type="checkbox"/> Bypass or amputation for gangrene or arterial insufficiency > 6 months ago<br><input type="checkbox"/> Chronic insufficiency                                                                                                          | <input type="checkbox"/> Intermittent claudication<br><input type="checkbox"/> Untreated thoracic or abdominal aneurysm (< 6 cm)<br><input type="checkbox"/> s/p abdominal or thoracic aortic aneurysm repair                                                                                           |
| <b>Respiratory System</b>        |                                                                                                                                                                                                                                                                                                                                                                                                                        |                                                                                                                                                                                                                                                                |                                                                                                                                                                                                                                                                                                         |
|                                  | <input type="checkbox"/> Marked pulmonary insufficiency<br><input type="checkbox"/> Restrictive Lung Disease or COPD with dyspnea at rest despite treatment<br><input type="checkbox"/> Chronic supplemental O <sub>2</sub><br><input type="checkbox"/> CO <sub>2</sub> retention (pCO <sub>2</sub> > 50 torr)<br><input type="checkbox"/> Baseline pO <sub>2</sub> < 50 torr<br><input type="checkbox"/> FEV1 (< 50%) | <input type="checkbox"/> Restrictive Lung Disease or COPD (chronic bronchitis, emphysema, or asthma) with dyspnea which limits activities<br><input type="checkbox"/> FEV1 (51%-65%)                                                                           | <input type="checkbox"/> Restrictive Lung Disease or COPD (chronic bronchitis, emphysema, or asthma) with dyspnea which has responded to treatment<br><input type="checkbox"/> FEV1 (66%-80%)                                                                                                           |
| <b>Gastrointestinal System</b>   |                                                                                                                                                                                                                                                                                                                                                                                                                        |                                                                                                                                                                                                                                                                |                                                                                                                                                                                                                                                                                                         |
| Hepatic                          | <input type="checkbox"/> Portal hypertension and/or esophageal bleeding ≤ 6 mos. (Encephalopathy, Ascites, Jaundice with Total Bilirubin > 2)                                                                                                                                                                                                                                                                          | <input type="checkbox"/> Chronic hepatitis, cirrhosis, portal hypertension with moderate symptoms "compensated hepatic failure"                                                                                                                                | <input type="checkbox"/> Chronic hepatitis or cirrhosis without portal hypertension<br><input type="checkbox"/> Acute hepatitis without cirrhosis<br><input type="checkbox"/> Chronic liver disease manifested on biopsy or persistently elevated bilirubin (>3 mg/dl)                                  |
| Stomach / Intestine              | <input type="checkbox"/> Recent ulcers (≤ 6 months ago) requiring blood transfusion                                                                                                                                                                                                                                                                                                                                    | <input type="checkbox"/> Ulcers requiring surgery or transfusion > 6 months ago                                                                                                                                                                                | <input type="checkbox"/> Diagnosis of ulcers treated with meds<br><input type="checkbox"/> Chronic malabsorption syndrome<br><input type="checkbox"/> Inflammatory bowel disease (IBD) on meds or h/o with complications and/or surgery                                                                 |
| Pancreas                         | <input type="checkbox"/> Acute or chronic pancreatitis with major complications (phlegmon, abscess, or pseudocyst)                                                                                                                                                                                                                                                                                                     | <input type="checkbox"/> Uncomplicated acute pancreatitis<br><input type="checkbox"/> Chronic pancreatitis with minor complications (malabsorption, impaired glucose tolerance, or GI bleeding)                                                                | <input type="checkbox"/> Chronic pancreatitis w/o complications                                                                                                                                                                                                                                         |

| <b>Cogent comorbid ailment</b>                                                                                                            | <b>Grade 3<br/>Severe Decompensation</b>                                                                                                                                                                                                                                                                                                                  | <b>Grade 2<br/>Moderate Decompensation</b>                                                                                                     | <b>Grade 1<br/>Mild Decompensation</b>                                                                                                                    |
|-------------------------------------------------------------------------------------------------------------------------------------------|-----------------------------------------------------------------------------------------------------------------------------------------------------------------------------------------------------------------------------------------------------------------------------------------------------------------------------------------------------------|------------------------------------------------------------------------------------------------------------------------------------------------|-----------------------------------------------------------------------------------------------------------------------------------------------------------|
| <b>Renal System</b>                                                                                                                       |                                                                                                                                                                                                                                                                                                                                                           |                                                                                                                                                |                                                                                                                                                           |
| End-stage renal disease                                                                                                                   | <input type="checkbox"/> Creatinine > 3 mg% with multi-organ failure, shock, or sepsis<br><input type="checkbox"/> Acute dialysis                                                                                                                                                                                                                         | <input type="checkbox"/> Chronic Renal Insufficiency with creatinine >3 mg%<br><input type="checkbox"/> Chronic dialysis                       | <input type="checkbox"/> Chronic Renal Insufficiency with creatinine 2-3 mg%.                                                                             |
| <b>Endocrine System (Code the comorbid ailments with the (*) in both the Endocrine system and other organ systems if applicable)</b>      |                                                                                                                                                                                                                                                                                                                                                           |                                                                                                                                                |                                                                                                                                                           |
| Diabetes Mellitus                                                                                                                         | <input type="checkbox"/> Hospitalization ≤ 6 months for DKA<br><input type="checkbox"/> Diabetes causing end-organ failure<br><input type="checkbox"/> retinopathy<br><input type="checkbox"/> neuropathy<br><input type="checkbox"/> nephropathy*<br><input type="checkbox"/> coronary disease*<br><input type="checkbox"/> peripheral arterial disease* | <input type="checkbox"/> IDDM without complications<br><input type="checkbox"/> Poorly controlled AODM with oral agents                        | <input type="checkbox"/> AODM controlled by oral agents only                                                                                              |
| <b>Neurological System</b>                                                                                                                |                                                                                                                                                                                                                                                                                                                                                           |                                                                                                                                                |                                                                                                                                                           |
| Stroke                                                                                                                                    | <input type="checkbox"/> Acute stroke with significant neurologic deficit                                                                                                                                                                                                                                                                                 | <input type="checkbox"/> Old stroke with neurologic residual                                                                                   | <input type="checkbox"/> Stroke with no residual<br><input type="checkbox"/> Past or recent TIA                                                           |
| Dementia                                                                                                                                  | <input type="checkbox"/> Severe dementia requiring full support for activities of daily living                                                                                                                                                                                                                                                            | <input type="checkbox"/> Moderate dementia (not completely self-sufficient, needs supervising)                                                 | <input type="checkbox"/> Mild dementia (can take care of self)                                                                                            |
| Paralysis                                                                                                                                 | <input type="checkbox"/> Paraplegia or hemiplegia requiring full support for activities of daily living                                                                                                                                                                                                                                                   | <input type="checkbox"/> Paraplegia or hemiplegia requiring wheelchair, able to do some self care                                              | <input type="checkbox"/> Paraplegia or hemiplegia, ambulatory and providing most of self care                                                             |
| Neuromuscular                                                                                                                             | <input type="checkbox"/> MS, Parkinson's, Myasthenia Gravis, or other chronic neuromuscular disorder and requiring full support for activities of daily living                                                                                                                                                                                            | <input type="checkbox"/> MS, Parkinson's, Myasthenia Gravis, or other chronic neuromuscular disorder, but able to do some self care            | <input type="checkbox"/> MS, Parkinson's, Myasthenia Gravis, or other chronic neuromuscular disorder, but ambulatory and providing most of self care      |
| <b>Psychiatric</b>                                                                                                                        |                                                                                                                                                                                                                                                                                                                                                           |                                                                                                                                                |                                                                                                                                                           |
|                                                                                                                                           | <input type="checkbox"/> Recent suicidal attempt<br><input type="checkbox"/> Active schizophrenia                                                                                                                                                                                                                                                         | <input type="checkbox"/> Depression or bipolar disorder uncontrolled<br><input type="checkbox"/> Schizophrenia controlled w/ meds              | <input type="checkbox"/> Depression or bipolar disorder controlled w/ medication                                                                          |
| <b>Rheumatologic (Incl. Rheumatoid Arthritis, Systemic Lupus, Mixed Connective Tissue Disorder, Polymyositis, Rheumatic Polymyositis)</b> |                                                                                                                                                                                                                                                                                                                                                           |                                                                                                                                                |                                                                                                                                                           |
|                                                                                                                                           | <input type="checkbox"/> Connective Tissue Disorder with secondary end-organ failure (renal, cardiac, CNS)                                                                                                                                                                                                                                                | <input type="checkbox"/> Connective Tissue Disorder on steroids or immunosuppressant medications                                               | <input type="checkbox"/> Connective Tissue Disorder on NSAIDs or no treatment                                                                             |
| <b>Immunological System (AIDS should not be considered a comorbidity for Kaposi's Sarcoma or Non-Hodgkin's Lymphoma)</b>                  |                                                                                                                                                                                                                                                                                                                                                           |                                                                                                                                                |                                                                                                                                                           |
| AIDS                                                                                                                                      | <input type="checkbox"/> Fulminant AIDS w/KS, MAI, PCP (AIDS defining illness)                                                                                                                                                                                                                                                                            | <input type="checkbox"/> HIV+ with h/o defining illness. CD4 <sup>+</sup> < 200/μL                                                             | <input type="checkbox"/> Asymptomatic HIV+ patient.<br><input type="checkbox"/> HIV <sup>+</sup> w/o h/o AIDS defining illness. CD4 <sup>+</sup> > 200/μL |
| <b>Malignancy (Excluding Cutaneous Basal Cell Ca., Cutaneous SCCA, Carcinoma in-situ, and Intraepithelial Neoplasm)</b>                   |                                                                                                                                                                                                                                                                                                                                                           |                                                                                                                                                |                                                                                                                                                           |
| Solid Tumor including melanoma                                                                                                            | <input type="checkbox"/> Uncontrolled cancer<br><input type="checkbox"/> Newly diagnosed but not yet treated<br><input type="checkbox"/> Metastatic solid tumor                                                                                                                                                                                           | <input type="checkbox"/> Any controlled solid tumor without documented metastases, but initially diagnosed and treated within the last 5 years | <input type="checkbox"/> Any controlled solid tumor without documented metastases, but initially diagnosed and treated > 5 years ago                      |
| Leukemia and Myeloma                                                                                                                      | <input type="checkbox"/> Relapse<br><input type="checkbox"/> Disease out of control                                                                                                                                                                                                                                                                       | <input type="checkbox"/> 1 <sup>st</sup> remission or new dx <1yr<br><input type="checkbox"/> Chronic suppressive therapy                      | <input type="checkbox"/> H/o leukemia or myeloma with last Rx > 1 yr prior                                                                                |
| Lymphoma                                                                                                                                  | <input type="checkbox"/> Relapse                                                                                                                                                                                                                                                                                                                          | <input type="checkbox"/> 1 <sup>st</sup> remission or new dx <1yr<br><input type="checkbox"/> Chronic suppressive therapy                      | <input type="checkbox"/> H/o lymphoma w/ last Rx >1 yr prior                                                                                              |
| <b>Substance Abuse (Must be accompanied by social, behavioral, or medical complications)</b>                                              |                                                                                                                                                                                                                                                                                                                                                           |                                                                                                                                                |                                                                                                                                                           |
| Alcohol                                                                                                                                   | <input type="checkbox"/> Delirium tremens                                                                                                                                                                                                                                                                                                                 | <input type="checkbox"/> Active alcohol abuse with social, behavioral, or medical complications                                                | <input type="checkbox"/> H/o alcohol abuse but not presently drinking                                                                                     |
| Illicit Drugs                                                                                                                             | <input type="checkbox"/> Acute Withdrawal Syndrome                                                                                                                                                                                                                                                                                                        | <input type="checkbox"/> Active substance abuse with social, behavioral, or medical complications                                              | <input type="checkbox"/> H/o substance abuse but not presently using                                                                                      |
| <b>Body Weight</b>                                                                                                                        |                                                                                                                                                                                                                                                                                                                                                           |                                                                                                                                                |                                                                                                                                                           |
| Obesity                                                                                                                                   |                                                                                                                                                                                                                                                                                                                                                           | <input type="checkbox"/> Morbid (i.e., BMI ≥ 38)                                                                                               |                                                                                                                                                           |

**OVERALL COMORBIDITY SCORE (Circle one.)**      **0**      **1**      **2**      **3**      **9**  
None      Mild      Moderate      Severe      Unknown

# **CODING OF INDIVIDUAL DISEASES, CONDITIONS, AND ILLNESSES**

## **Cardiovascular System**

### **Myocardial Infarction**

#### **Grade 1, Slight Decompensation**

- MI as demonstrated by ECG with the age undetermined. The ECG is the only documentation of the previous asymptomatic MI.

#### **Grade 2, Moderate Decompensation**

- MI more than 6 months prior to zero time

#### **Grade 3, Full Decompensation**

- MI within the past 6 months of zero time

### **Angina/Coronary Artery Disease**

#### **Grade 1**

- ECG or stress test evidence or catheterization evidence of coronary disease without symptoms
- Angina pectoris not requiring hospitalization
- Angina attack compensated with treatment
- Coronary Artery Bypass Graft (CABG) or Percutaneous Transluminal Coronary Angioplasty (PTCA) for severe Coronary Artery Disease (CAD) greater than 6 months prior to zero time
- Coronary stent placement greater than 6 months prior to zero time

#### **Grade 2**

- Chronic exertional angina
- Recent Coronary Artery Bypass Graft (CABG) or Percutaneous Transluminal Coronary Angioplasty (PTCA) for severe Coronary Artery Disease (CAD) within past 6 months of zero time
- Coronary stent placement within the past 6 months of zero time

#### **Grade 3**

- Unstable angina - (clinical syndrome characterized by angina of new onset, angina at rest or with minimal exertion, or a crescendo pattern of angina with episodes of increasing frequency, severity or duration). May carry a risk of acute myocardial infarction as high as 20%.

## Congestive Heart Failure

### Grade 1

- CHF with dyspnea which has responded to treatment
- Exertional dyspnea
- Paroxysmal Nocturnal Dyspnea (PND)

### Grade 2

- Hospitalized for congestive heart failure (CHF) more than 6 months prior to zero time
- Congestive heart failure (CHF) with dyspnea which limits activities

### Grade 3

- Hospitalized for CHF within the past 6 months of zero time
- Ejection fraction of less than 20%.

**Note:** The ejection fraction can be found on the echocardiogram.

## Arrhythmia

### Grade 1

- Sick Sinus Syndrome (SSS)

### Grade 2

- Ventricular arrhythmia more than 6 months prior to zero time
- Chronic atrial fibrillation or flutter (Please note new onset also coded as Grade 2)
- Pacemaker at the date of diagnosis regardless of time used

### Grade 3

- Ventricular arrhythmia within the past 6 months of zero time

### Note:

- Arrhythmia not otherwise specified, bradyarrhythmia, and sinus tachyarrhythmia (> 100 beats per minute) are not coded as comorbid conditions.
- Arrhythmic comorbid conditions should be coded regardless if being treated with medication
- Arrhythmic conditions (other than ventricular arrhythmia) must be present at the date of diagnosis to be coded
- Notation of Wolff-Parkinson-White Syndrome, Wenckebach, or other types of named syndromes associated with atrial fibrillation should be coded Grade 2 Chronic Atrial Fibrillation or Flutter

**Mini Scenario:** A man had a pacemaker 10 years ago for a short period of time, but he did not have the pacemaker nor did he have any arrhythmias at the time of diagnosis. Therefore, the individual would not be given a comorbidity score for the arrhythmia.

## Hypertension

**Note:** On a blood pressure reading, the top number is the systolic blood pressure and the bottom number is the diastolic blood pressure.

### Grade 1

- Diastolic blood pressure (DBP) between 90-114 mm Hg with diagnosed hypertension, not taking antihypertensive medication
- DBP <90 mm Hg while taking antihypertensive medications (See list of medications below Grade 3)
- Hypertension, not otherwise specified
- No secondary cardiovascular symptoms such as headaches, epistaxis, vertigo, edema, etc

### Grade 2

- DBP between 115 - 129 mm Hg with diagnosed hypertension, regardless of treatment
- DBP between 90-114 mm Hg while taking antihypertensive medication
- Secondary cardiovascular symptoms: vertigo, epistaxis, headaches, etc., regardless of treatment

### Grade 3

- DBP greater or equal to 130 mm Hg, regardless of treatment
- Severe malignant papilledema or other eye changes, such as retinal damage, retinal hemorrhages, and/or retinal exudates, regardless of treatment
- Encephalopathy, regardless of treatment

**Note:** Do not code hypertension as comorbidity based on single elevated DBP unless the patient is specifically diagnosed with hypertension. An elevated DBP recorded on a nursing note or anesthesia-screening examination may be related to stress and anxiety and should not be used solely to determine grade. On the other hand, consistently elevated DBP is to be coded. It is anticipated that most hypertensive patients will receive a severity grade of 1.

## **Venous Disease**

### **Grade 1**

- Old deep vein thrombosis (DVT) no longer treated with medication (Coumadin or Heparin)

### **Grade 2**

- DVT controlled with Coumadin or Heparin
- Old pulmonary embolism (greater than 6 months prior to zero time)

### **Grade 3**

- Recent PE (less than six months prior to zero time)
- Use of venous filter to prevent pulmonary embolism (PE) dissemination
- Patient required surgery (filter) and is now on anticoagulation therapy to prevent further thrombus formation

## **Peripheral Arterial Disease**

### **Grade 1**

- Intermittent claudication
- Untreated thoracic or abdominal aneurysm (< 6 cm)
- s/p abdominal or thoracic aortic aneurysm repair

### **Grade 2**

- Bypass or amputation for gangrene or arterial insufficiency (e.g., carotid endarterectomy, femoral/popliteal bypass, etc.) greater than six months prior to diagnosis
- Chronic arterial insufficiency

### **Grade 3**

- Bypass or amputation for gangrene or arterial insufficiency (e.g., carotid endarterectomy, femoral/popliteal bypass, etc.) less than six months prior to diagnosis
- Untreated thoracic or abdominal aneurysm ( $\geq 6$  cm)
- Acute unexpected arterial condition usually secondary to blood clot or other limited event

**Note:** Amputation must consist of whole foot or higher.



## List of selected Cardiovascular Drugs

### **Ace Inhibitors**

- lisinopril (Prinivil, Zestril)
- benazepril (Lotensin)
- captopril (Capoten)
- enalapril (Vasotec)
- fosinopril (Monopril)
- quinapril (Accupril)
- ramipril (Altace)

### **Angiotensin II Receptor Antagonists**

- losartan (Cozaar)
- valsartan (Diovan)
- irbesartan (Avapro)
- candesartan (Atacand)

### **Beta Blockers**

- metoprolol (Lopressor)
- bisoprolol (Zebeta)
- propranolol (Inderal)
- carvedilol (Coreg)
- penbutolol (Levatol)

### **Diuretics**

- furosemide (Lasix)
- bumetanide (Bumex)
- torsemide (Demadex)
- chlorothiazide (Diuril)

### **Digitalis**

- Digoxin (Lanoxin)

### **Vasodilators**

- hydralazine (Apresoline)
- isosorbide dinitrate

### **Aldosterone-receptor inhibitor**

- spironolactone (Aldactone)

### **Calcium-channel blockers**

- diltiazem (Cardizem, Dilacor, Diltia, Tiamate, Tiazac)
- verapamil (Calan, Ioptin, Verelan, Covera)
- amlodipine (Norvasc)
- nifedipine (Adalat, Procardia)

# Respiratory System

COPD - clinical syndrome of chronic dyspnea with expiratory airflow obstruction due to chronic bronchitis, emphysema, and asthma.

## Grade 1

- Patient with diagnosed Restrictive Lung Disease or COPD that has responded to treatment activity.
- Dyspnea with significant activity (flight of stairs) or dyspnea of episodic nature
- Forced Expiratory Volume (FEV1) (66% - 80%)

## Grade 2

- Patient with diagnosed Restrictive Lung Disease or COPD with dyspnea which limits activities.
- Dyspnea on mild exertion (walking from chair to TV)
- FEV1 (51% - 65%)

## Grade 3

- Marked pulmonary insufficiency.
- Restrictive Lung Disease or COPD with dyspnea at rest despite treatment
- Chronic supplemental oxygen
- Carbon dioxide retention (as evidenced by arterial carbon dioxide value of greater than 50 torr) ( $pCO_2 > 50$  torr)
- Hypoxemia (low blood oxygen) as evidenced by  $PO_2 < 50$  torr
- FEV1 (<50%)

## Note:

- 1 torr = 1 mmHg
- ALL applicable conditions should be checked on the ACE-27. For example, a person with a FEV1 = 49% and COPD with dyspnea at rest should have two boxes checked on the comorbidity form under Grade 3.
- If multiple information is given with different severity grading, select the least severe grade. See example below.

**Mini Scenario:** A 55 year old man has been diagnosed with lung cancer. He has a 3-year history of COPD and a 52 pack-year history. He is being treated with two respiratory medications. The medical record states "dyspnea on exertion which limits activities" and "SOB with short walks." Lab values show a FEV1 = 47%. The statements in the chart indicate moderate comorbidity, while the FEV1 value suggests severe comorbidity. Since multiple information is given, select **Moderate**, the least severe grade between the two.

## **List of selected Respiratory Drugs**

### **Anti-Leukotrienes**

- zafirlukast (Accolate)
- zileuton (Zyflo)

**Theophylline** (Slo-Bid Gyrocaps, Unidur, Theo-Dur)

### **Anticholinergic agents**

- ipratropium (Combivent)

### **BRONCHODILATORS**

### **β- Adrenergic agonists**

- albuterol (Proventil, Ventolin)
- bitolterol mesylate (Tornalate)
- pirbuterol (Maxair)
- terbutaline (Brethaire)
- salmeterol (Serevent)

### **ANTI-INFLAMMATORY DRUGS**

### **Corticosteroids**

- beclomethasone dipropionate (Beclovent, Vanceril)
- budesonide (Pulmicort Turbuhaler)
- flunisolide (Aerobid)
- fluticasone propionate (Flovent)
- Triamcinolone acetonide (Azmacort)
- Prednisone

**Cromolyn sodium** (Intal)

**Nedocromil sodium** (Tilade)

# Gastrointestinal System

## Hepatic

### Grade 1

- Chronic hepatitis or cirrhosis without portal hypertension
- Acute hepatitis (except type A) without cirrhosis
- Chronic active or carrier cases of hepatitis (except type A)
- Chronic liver disease manifested on biopsy or persistently elevated bilirubin (>3 mg/dl)

### Grade 2

- Chronic hepatitis, cirrhosis, or portal hypertension with moderate symptoms (including hepatomegaly, cutaneous spiders, caput medusa, palmar erythema) as a manifestation of chronic liver disease or "compensated hepatic failure"

### Grade 3

- Patient with portal hypertension and/or esophageal bleeding  $\leq$  6 mos. (Encephalopathy, Ascites, Jaundice with Total Bilirubin >2)

**Note:** Code all types of Hepatitis (B, C, D, E, and NANB), except Hepatitis A. If medical record only states "hepatitis in past" or "exposure to hepatitis", then do not code as a comorbidity.

**Mini Scenario:** A male was diagnosed with colorectal cancer in May of 1998. In the History and Physical portion of the medical record, there is a statement "Hepatitis 1983." Since the type of hepatitis is not specified and no other information is given, do not code hepatitis as a comorbid condition.

## Stomach/Intestine

### Grade 1

- Diagnosis of ulcers including peptic ulcer disease (PUD), duodenal ulcer, or erosive gastritis treated with medications only
- Chronic malabsorption syndrome.
- Chronic Inflammatory Bowel Diseases -- Ulcerative colitis (UC), Crohn's disease, or Inflammatory Bowel Disease (IBD) on medication or with history of complications and/or surgery due to this condition.

**Note:** Erosive gastritis includes NSAID gastroenteropathy, stress-related mucosal damage and ulcers, alcohol gastropathy, phlegmonous gastritis, chronic erosive gastritis, postoperative alkaline gastritis, gastric ischemia, Menetrier's disease, eosinophilic gastritis, granulomatous gastritis, watermelon stomach

**Grade 2**

- Diagnosis of ulcers, including PUD, duodenal ulcer, or erosive gastritis with bleeding requiring surgery or transfusion greater than 6 months ago.

**Grade 3**

- Diagnosis of ulcers, including PUD, duodenal ulcer, or erosive gastritis with recent ( $\leq 6$  months) major bleeding.

**Note:** Gastroesophageal reflux alone or history of ulcers, but not currently on medications, should not be coded as comorbid conditions.

**List of Selected Drugs for Treatment of Inflammatory Bowel Diseases****Ulcerative colitis**

- Sulfasalazine
- Corticosteroids
- Immunosuppressive agents (Azathioprine (AZT), 6-mercaptopurine)

**Crohn's disease**

- Sulfasalazine
- Corticosteroids
- Immunosuppressive agents (Azathioprine (AZT), 6-mercaptopurine)
- Metronidazole

**List of Selected Drugs for Treatment of Ulcers****Antibacterials**

- bismuth subsalicylate (Pepto Bismol)
- tetracycline (Achromycin)
- metronidazole (Flagyl)
- amoxicillin (Amoxil)
- clarithromycin (Biaxin)

**H<sub>2</sub>-receptor antagonists**

- cimetidine (Tagamet)
- famotidine (Pepcid)
- nizatidine (Axid)
- ranitidine (Zantac)

**Omeprazole (Prilosec)****Sucralfate (Carafate)****Misoprostol (Cytotec)****Magnesium hydroxide / aluminum hydroxide / simethicone antacids (Maalox Plus, Mylanta Double Strength)**

## **Pancreas**

### **Grade 1**

- Chronic pancreatitis (abnormal lab values especially Lipase and Amylase) without complications.

### **Grade 2**

- Uncomplicated acute pancreatitis.
- Chronic pancreatitis with minor complications (e.g., malabsorption, impaired glucose tolerance, GI bleeding, icterus, bone pain, or endocrine insufficiency)

### **Grade 3**

- Acute or chronic pancreatitis with major complications (e.g., infection, pseudocyst formation, pulmonary complications, acute renal failure, abscess, or phlegmon)

# Renal System

## Grade 1

- Chronic renal insufficiency with Creatinine 2-3 mg %.

## Grade 2

- Chronic renal insufficiency with Creatinine > 3 mg % without secondary effects
- Chronic dialysis (on dialysis for more than 6 months prior to zero time)

**Note:** Secondary effects include anemia (low hematocrit), acidosis, hypertension, renal osteodystrophy (bone disease), secondary hyperparathyroidism (increase parathyroid hormone) due to hyperphosphatemia (elevated phosphate) and hypocalcemia (low calcium), and hypermagnesemia.

## Grade 3

- Creatinine greater than 3 mg% with multi-organ failure, shock, or sepsis
- End stage renal disease (ESRD) receiving dialysis
- Acute dialysis (on dialysis less than 6 months prior to zero time)

**Note:** Do not code kidney transplant as comorbidity. Code the underlying medical condition.

**Mini Scenario:** A woman had a kidney transplant two years prior to her cancer diagnosis. The kidney was rejected immediately after the transplant occurred. She has been on dialysis ever since the rejection. She would receive a **2** for **chronic dialysis**.

# Endocrine System

## Diabetes Mellitus (DM)

### Grade 1

- Adult onset diabetes mellitus (AODM) controlled by oral agents

### Grade 2

- Insulin-dependent diabetes without complications or end-organ failure
- AODM poorly controlled with oral agents. Poorly controlled implies elevated glucose values despite use of oral agents. Frequent medical visits for evaluation of blood glucose and modifications in therapy.

### Grade 3

- Diabetic ketoacidosis (DKA) with recent hospitalization.
- Diabetes causing end organ failure including retinopathy, neuropathy, nephropathy, coronary disease, and peripheral arterial disease.

### Note:

- If AODM is controlled by diet alone do not code as a comorbid condition.
- For Grade 3, code the comorbid ailments of nephropathy, coronary disease, and peripheral arterial disease in both the endocrine system and other organ system (i.e., Renal, Cardiovascular, or Peripheral Vascular Disease)

**Mini Scenario 1:** A man is diagnosed with pancreatic cancer and has a "recent" diagnosis of diabetes. The chart states that the date of diagnosis for the diabetes is 2 months prior to the diagnosis of cancer. The patient is on oral meds at the time of cancer diagnosis. Since the diabetes occurred because of the disease process of the pancreatic cancer, do not code the diabetes as a comorbidity.

**Mini Scenario 2:** A woman has had IDDM for several years prior to a diagnosis of cancer. The chart states that she has retinopathy treated with laser eye surgery. The chart did not specifically state that the retinopathy is associated with the IDDM. Because diabetes mellitus is the leading cause of retinopathy, especially in those with known longstanding diabetes mellitus, code this case as diabetes causing retinopathy – Grade 3.



# Neurological System

## Stroke or Cerebral Vascular Accident (CVA)

### Grade 1

- Old (greater than 6 months) stroke without neurological residual
- Past transient ischemic attacks (TIAs) or reversible ischemic neurological deficit (RIND)

**Note:** TIA- transient ischemic attacks that are focal and abrupt in onset usually lasting for 5-20 minutes and which may last as long as 24 hrs.

RIND- reversible ischemic neurologic deficit lasts longer than 24 hrs. and less than 7 days

### Grade 2

- Old stroke with residual

### Grade 3

- Acute stroke with coma or significant neurologic deficit

**Note:** Residual includes loss of vision, difficulty speaking, aphasia (loss or impairment of the power to use or comprehend words), paresis, or sensory disturbance

## Dementia

### Grade 1

- Mild dementia (can take care of self).

### Grade 2

- Moderate dementia (not completely self-sufficient, needs supervision)

### Grade 3

- Severe dementia (Confined to nursing home or needs constant support.)

**Note: Basic Activities of Daily Living (ADL)**

Eating, Bathing, Toileting, Dressing, Grooming,  
Transferring (to/from bed/chair/bath), Ambulating (or other locomotion),  
and Communicating

**Instrumental Activities of Daily Living (IADL)**

Writing, Reading, Cooking, Cleaning, Shopping, Doing laundry, Climbing stairs, Using the telephone, Managing medications, Managing money, Traveling out of home, Maintaining upkeep of home

## Paralysis

**Grade 1**

- Paraplegia or hemiplegia but ambulatory and providing most of self care

**Grade 2**

- Paraplegia or hemiplegia requiring wheelchair, but able to do some self care

**Grade 3**

- Paraplegia or hemiplegia requiring full support for activities of daily living

**Neuromuscular**

**Grade 1**

- Multiple Sclerosis, Parkinson's disease, Myasthenia Gravis, or other chronic neuromuscular disorder, but ambulatory and providing most of self care

**Grade 2**

- Multiple Sclerosis, Parkinson's disease, Myasthenia Gravis, or other chronic neuromuscular disorder, but able to do some self care

**Grade 3**

- Multiple Sclerosis, Parkinson's disease, Myasthenia Gravis, or other chronic neuromuscular disorder and requiring full support for activities of daily living

# Psychiatric

## Grade 1

- Depression or bipolar disorder controlled w/ medication

## Grade 2

- Depression or bipolar disorder uncontrolled
- Schizophrenia controlled with medication

## Grade 3

- Recent suicide attempt
- Active schizophrenia

**Note:** Depression is not situational and should predate the diagnosis of cancer.

Anxiety is not considered a comorbid condition.

# Rheumatologic

## **Connective Tissue Diseases including Rheumatoid Arthritis, Systemic Lupus Erythematosus (SLE), Mixed connective tissue disease (MCTD), Polimyositis (PM), Rheumatic Polymyositis, Dermatomyositis (DM), Scleroderma**

**Note:** Osteoarthritis (Degenerative Joint Disease), fibromyalgia, and carpal tunnel syndrome are not coded as comorbid conditions

### **Grade 1**

- Connective Tissue Disorder on non-steroidal anti-inflammatory drugs (NSAIDS) or no treatment

### **Grade 2**

- Connective Tissue Disorder on steroids or immunosuppressant medications

### **Grade 3**

- Connective Tissue Disorder with secondary end-organ failure (renal, cardiac, central nervous system)

# Immunological System

## Acquired Immunodeficiency Syndrome (AIDS)

### Grade 1

- Asymptomatic HIV+ patient
- Human Immunodeficiency virus (HIV) positive without history of AIDS defining illness, however, positive for the flu-like syndrome of early infection
- CD4 - T-lymphocyte count  $\Rightarrow$  CD 4+  $>$  200 /  $\mu$ l

### Grade 2

- HIV + with history of defining illness which is an opportunistic infection in addition to the primary HIV infection (See list below.)
- CD 4+  $<$  200 /  $\mu$ l

### Grade 3

- Fulminant AIDS with Mycobacterium Avium Intracellulare (MAI), or Pneumocystis Carinii Pneumoniae (PCP)

### Note: AIDS defining illness:

1. Viral infections such as: Cytomegalovirus (CMV), Creutzfeld-Jakob (CJ) virus, Herpes simplex virus, etc.
2. Bacterial infections: Salmonella, Syphilis, bacterial pneumonias (strep, HIB)
3. Mycobacterial infections: Mycobacterium Avium-Intracellulare (MAI), Tuberculosis
4. Fungal infection: Candidiasis (oral, esophageal and vaginal infections), Cryptococcosis (CNS disease), Histoplasma capsulatum (disseminated disease and septicemia), Coccidioides immitis (extensive pulmonary disease)
5. Pneumocystis Carinii Pneumonia (PCP)
6. Protozoal infection: Toxoplasmosis (causes CNS lesions with encephalopathy), Cryptosporidium (causes enteric infections)
7. Neoplasms: non-Hodgkin's lymphoma (NHL), Kaposi's sarcoma (KS).

**Mini Scenario:** A 32-year-old male has AIDS, pneumocystis carinii pneumonia, and COPD. A lymph node biopsy is performed and a diagnosis of Kaposi's Sarcoma is made. KS, therefore, is the index cancer. In this situation, AIDS, pneumocystis carinii pneumonia, and KS are all directly related to each other, so AIDS and pneumocystis carinii should not be considered a comorbid ailment for the patient with Kaposi's Sarcoma.

## Malignancy

**THE INDEX CANCER SHOULD NEVER BE CODED AS A COMORBIDITY.**

**In the event that there are multiple primaries (i.e., synchronous or metachronous), the primary being abstracted would be the index primary, and the other primary(s) would be a comorbidity of the index primary. To determine whether multiple primaries exist, refer to the table at the end of this section adopted from the Registry Operations and Data Standards manual.**

### Solid Tumor

#### Grade 1

- Any controlled solid tumor without documented metastases, but initially diagnosed and treated greater than five years ago

#### Grade 2

- Any controlled solid tumor without documented metastases, but initially diagnosed and treated within the last 5 years

#### Grade 3

- Uncontrolled cancer (i.e., previous treatment without complete response. Patient with persistence or recurrence)
- Newly diagnosed but not yet treated (note: this includes tumors diagnosed anytime during initial treatment of the primary)
- Metastatic solid tumor

**Mini Scenario 1:** A female had chondrosarcoma with a finger amputation four years prior to the date of diagnosis of the index cancer. The sarcoma is controlled at the date of diagnosis. Therefore, code as a **2** for **controlled solid tumor**.

**Mini Scenario 2:** A male was diagnosed with prostate cancer in September of 1999. He had two previous primaries, rectal and oral cavity, in 1995 and 1996. Both the rectal and oral cavity malignancies are controlled at the date of prostate cancer diagnosis. This man would receive a **2** for **controlled solid tumor** even though he had two previous primaries within the past five years.

**Mini Scenario 3:** A female is diagnosed with breast cancer at the same time she is diagnosed with a separate liver cancer. In this scenario, the liver cancer would be a comorbidity of the breast cancer, and the breast cancer would be a comorbidity of the liver cancer. Each case, then, would receive a **Grade of 3** for **"Newly diagnosed but not yet treated"** due to the other synchronous tumor

**Note:** Always exclude from coding as malignancy:

1. Basal cell carcinoma
2. Non-invasive squamous cell carcinoma of skin.
3. Cervical carcinoma in-situ (CIS)
4. Carcinoid tumor of the appendix / small intestine
5. Paget disease of bone
6. Bowen's disease
7. Barrett's esophagus
8. Insulinoma
9. Benign brain tumors (Meningioma, Craniopharyngioma)

**Note:** Starting with January 1, 2001 diagnoses, the new ICD-0-3 guidelines implementation has changed the following solid tumors from borderline to malignant. Thus, include these conditions as comorbid malignancy (even if occurred prior to January 1,2001):

1. Endometrial stromal sarcoma, low grade
2. Endolymphatic stromal myosis
3. Endometrial stromatosis
4. Stromal endometriosis
5. Stromal myosis, NOS
6. Papillary ependymoma
7. Papillary meningioma

## **Leukemia, Myeloma, and Hematopoietic Disorders**

### **Grade 1**

- History of leukemia, myeloma, or hematopoietic disorder with last therapy greater than one year ago
- Indolent leukemia, myeloma, or hematopoietic disorder not receiving therapy (e.g. chronic lymphocytic leukemia )

### **Grade 2**

- First remission or new diagnosis of non-indolent Leukemia, Myeloma, or Hematopoietic Disorders less than one year ago
- Chronic suppressive therapy

### **Grade 3**

- Relapse
- Disease out of control

**Mini Scenario:** A male is diagnosed with lung cancer at the same time he is diagnosed with leukemia. In this scenario, the lung cancer would be a comorbidity of the leukemia, and the leukemia would be a comorbidity of the lung cancer. The lung cancer case, then, would receive a **Grade of 2** for "First remission or new diagnosis less than one year ago" due to the leukemia; the leukemia would receive a **Grade of 3** for "Newly diagnosed but not yet treated" due to the lung cancer.



**Note:** Leukemias as defined by the American Cancer Society include acute lymphocytic leukemia, chronic lymphocytic leukemia, acute myeloid leukemia, chronic myeloid leukemia, etc. Also, starting with January 1, 2001 diagnoses, the new ICD-0-3 implementation has changed the following conditions from borderline to malignant. Thus, code the following comorbidities as a malignancy if they occurred after January 1, 2001:

1. Polycythemia vera
2. Polycythemia rubra vera
3. Chronic myeloproliferative disease, NOS
4. Chronic myeloproliferative disorder
5. Myelosclerosis w/ myeloid metaplasia
6. Megakaryocytic myelosclerosis
7. Myelofibrosis w/ myeloid metaplasia
8. Idiopathic thrombocythemia
9. Essential thrombocythemia
10. Essential hemorrhagic thrombocythemia
11. Idiopathic hemorrhagic thrombocythemia
12. Refractory anemia, NOS
13. Refractory anemia w/o sideroblasts
14. Refractory anemia w/ sideroblasts
15. Refractory anemia w/ ringed sideroblasts
16. Refractory anemia w/ excess blasts
17. Refractory anemia w excess blasts in transformation
18. Myelodysplastic syndrome, NOS
19. Preleukemia
20. Preleukemic syndrome

## Lymphoma

### Grade 1

- History of lymphoma with last therapy greater than one year ago
- Indolent, or low-grade, lymphoma not receiving therapy

### Grade 2

- First remission or new diagnosis less than one year ago
- Chronic suppressive therapy

### Grade 3

- Relapse
- Disease out of control

**Note:** Lymphomas as defined by the American Cancer Society include Hodgkin's disease or Non-Hodgkin's lymphoma.

**Mini Scenario:** A female is diagnosed with ovarian cancer at the same time she is diagnosed with lymphoma. In this scenario, the ovarian cancer would be a comorbidity of the lymphoma, and the lymphoma would be a comorbidity of the ovarian cancer. The ovarian cancer case, then, would receive a **Grade of 2** for "**First remission or new diagnosis less than one year ago**" due to the lymphoma; the lymphoma would receive a **Grade of 3** for "**Newly diagnosed but not yet treated**" due to the ovarian cancer.

### *Determining Multiple Primaries*

| LESIONS            | SITE(S)               | HISTOLOGY                                        | VARIABLES                                              | PRIMARY                                                                                                                                                                                          |
|--------------------|-----------------------|--------------------------------------------------|--------------------------------------------------------|--------------------------------------------------------------------------------------------------------------------------------------------------------------------------------------------------|
| Single             | Single                | Single                                           |                                                        | Single                                                                                                                                                                                           |
|                    | Single                | Mixed/multiple                                   |                                                        | Single                                                                                                                                                                                           |
| Single or multiple | Single                | Single                                           | Different behavior codes, in situ (2) and invasive (3) | Single                                                                                                                                                                                           |
|                    | Same as previous site | Same as previous histology                       | Within two months of diagnosis                         | Recurrence of the original primary                                                                                                                                                               |
|                    | Same as previous site | Same as previous histology                       | More than two months after diagnosis                   | New primary UNLESS physician states it is metastatic.<br><br><b>Exceptions:</b> Basal, Squamous, basosquamous cell carcinoma of the skin, bladder, Kaposi's sarcoma, adenocarcinoma of prostate. |
| Multiple           | Single                | Single                                           | Simultaneous                                           | Single                                                                                                                                                                                           |
|                    | Multiple              | Single                                           | Simultaneous                                           | Multiple UNLESS physician states it is metastatic.<br><br><b>Exceptions:</b> Ovaries (simultaneous bilateral), retinoblastoma, and Wilms' tumor are single primaries.                            |
|                    | Single                | Mixed/multiple                                   | Simultaneous                                           | Single                                                                                                                                                                                           |
|                    | Single                | Multiple (Each tumor has a different histology.) | Simultaneous                                           | Multiple<br><br><b>Exceptions:</b> Breast (lobular and ductal; bladder transitional and papillary).                                                                                              |
|                    | Multiple              | Multiple                                         | Simultaneous                                           | Multiple                                                                                                                                                                                         |

*Registry Operations and Data Standards / 21*

# Substance Abuse

## Alcohol

### Grade 1

- History of alcohol abuse with social, behavioral, or medical complications, but not presently drinking

### Grade 2

- Active alcohol abuse with social, behavioral, or medical complications, including: single episode of delirium tremens or alcohol-related seizure, one or more episodes of hospitalization for alcohol-associated ailments, significant behavioral problems caused by drinking ("drinking problem"), or nutritionally caused cachexia or anemia due to patient's drinking.

### Grade 3

- More than one episode of delirium tremens (DT) or alcoholic seizure and currently drinking

## Illicit Drugs

### Grade 1

- History of substance abuse with social, behavioral, or medical complications, but not presently using

### Grade 2

- Active substance abuse with social, behavioral, or medical complications

### Grade 3

- Acute withdrawal syndrome

**Note:** Classify an individual as a current alcohol/drug abuser if they quit within six months of the date of diagnosis.

**Mini Scenario:** A woman with social, medical, or behavioral complications that quit drinking four months prior to the date of diagnosis would be coded as a **2** for **current drinker** with other problems.

**Note:** If the medical record mentions the substance, but does not suggest any associated social, behavioral, or medical complications, do not code it as Substance Abuse.

**Mini Scenario:** A man drinks a 12-pack of beer per day but no additional details are indicated in connection with this habit. In this case, he would receive a **0** for Substance Abuse.

# Body Weight

## Obesity

The influence of excess body weight on the risk of death was characterized by Calle et al (Calle EE, Rodriguez C, Walker-Thurmond K, Thun MJ: Overweight, obesity, and mortality from cancer in a prospectively studied cohort of US adults. *New England Journal of Medicine*. 2003;348:1625-1638.) Please refer to the following charts for Body Mass Index calculation. Find patient's appropriate height and weight in metric or English scale on the appropriate chart. If the point falls below the line, the patient is considered morbidly obese and should receive a comorbidity grade of 2. Do not code as morbid obesity based only on statements from the chart. Actual calculation of BMI based on height and weight is required.

### Grade 1

- Not applicable

### Grade 2

- Morbid Obesity (BMI  $\geq$  38)

### Grade 3

- Not applicable



# BODY MASS INDEX CHART (English)

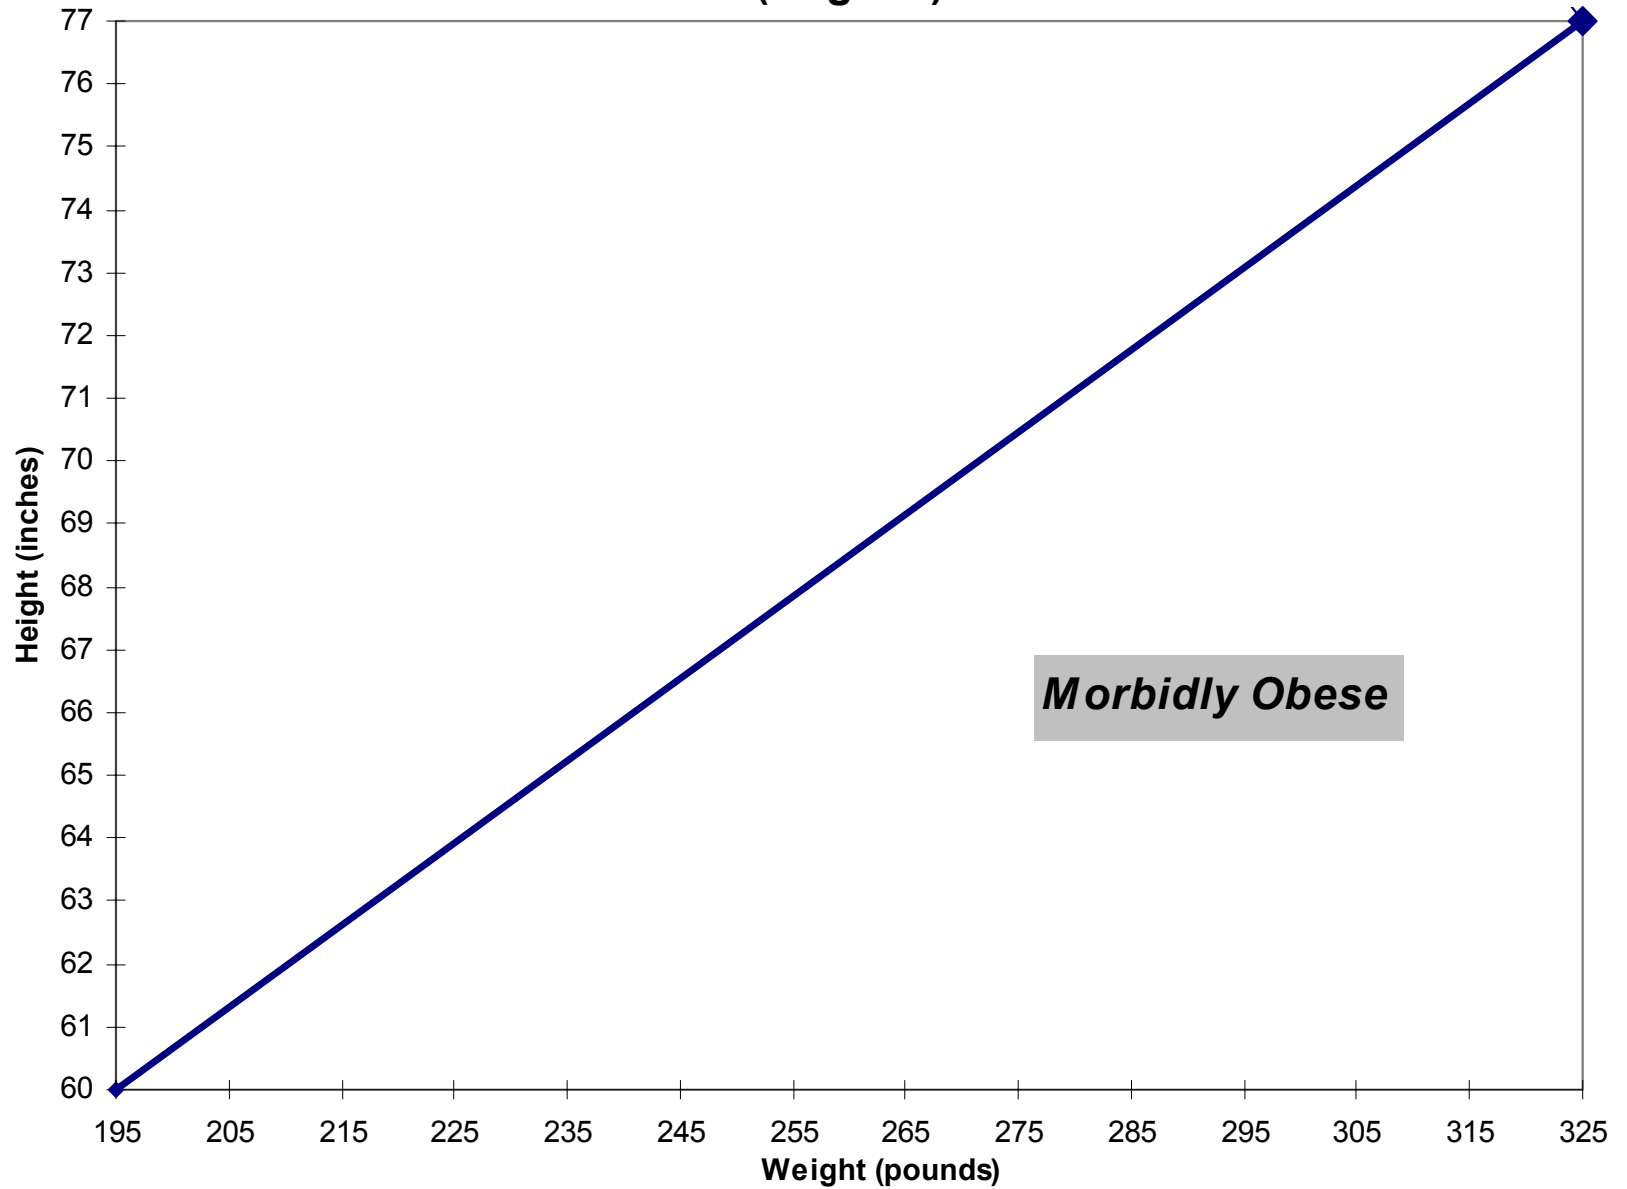

# BODY MASS INDEX CHART (Metric)

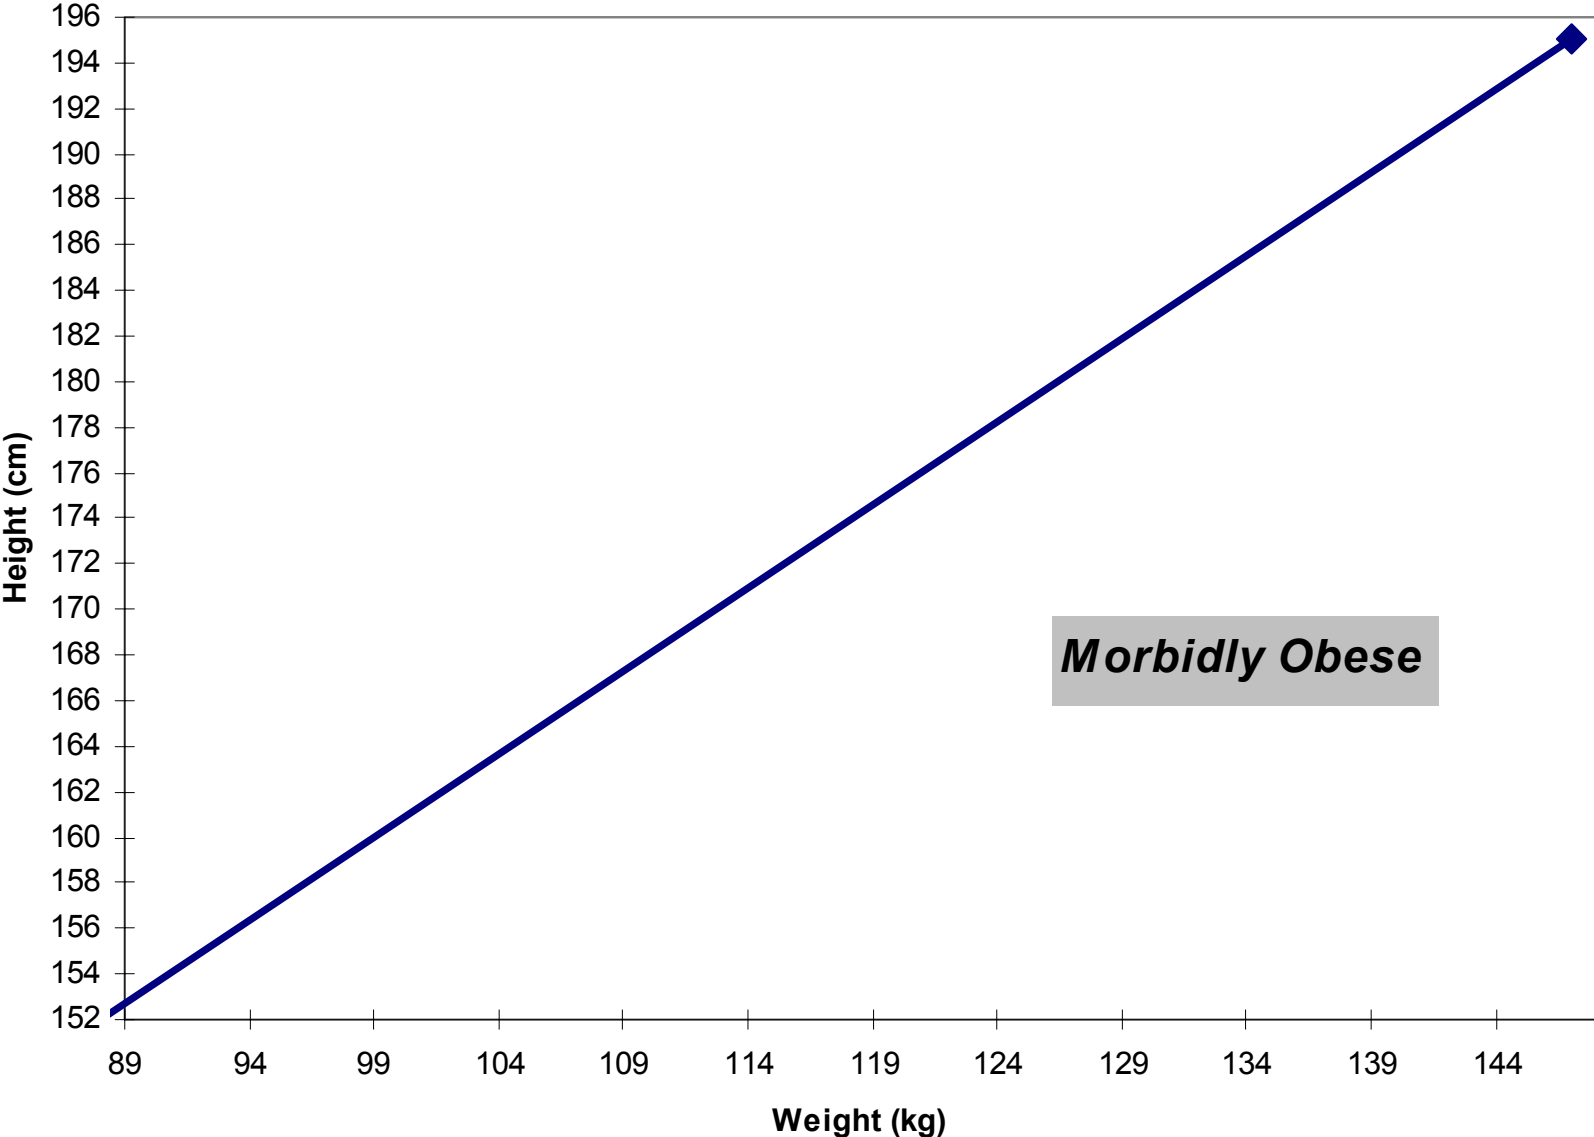



## **SCENARIOS**

In this section, five clinical scenarios drawn from the Barnes-Jewish Hospital Oncology Data Services experience are presented to help the reader test their knowledge of comorbidity.

## **SCENARIO #1**

**DATE:** September 3, 1998

**CHIEF COMPLAINT:** shortness of breath, dysphagia and fatigue.

**HISTORY OF PRESENT ILLNESS:** 54 year old male construction worker referred because of a 3 month history of shortness of breath, difficulty swallowing, and fatigue. He says that in the past 2 months he has lost approximately 25 pounds, and is constantly tired and out of breath, independent of the activity performed. He denies hemoptysis, hoarseness, otalgia, nausea, vomiting, or neck pain.

### **PAST MEDICAL HISTORY:**

Surgical History: Tonsillectomy and Adenoidectomy in childhood. Appendectomy many years ago.

Medical History:

Hypertension controlled with diuretic and an ACE inhibitor.

Insulin dependent Diabetes Mellitus poorly controlled.

Diagnosis of bipolar disorder currently on lithium.

+ Deep Vein Thrombosis patient currently on Coumadin.

Denies Tuberculosis, Myocardial Infarction, Heart Disease.

Medications: Lasix, Enalapril, Coumadin, Insulin, Lithium.

**SOCIAL HISTORY:** Smokes 2 ½ packs per day since age thirteen. Drinks 2 beers a day.

**FAMILY HISTORY:** Father died of heart attack at age 65.

**PHYSICAL EXAM:** 54 year old male with shortness of breath.

Extraocular movement: full

Ears: neg: Nose: neg.

Oral cavity/Oropharynx: neg

Nasopharynx: neg

Hypopharynx/Larynx : Large mass in the right epiglottis extending downwards making it hard to visualize the true vocal cords.

Neck: 3 cm ipsilateral neck mass, firm and fixed.

Lungs: Soft crackles bilateral

Heart : normal sinus rhythm, no murmurs.

Abdomen: Soft and non tender.

Neuro: Normal

Extremities: Left leg slightly edematous, pedal pulse diminished.

Review of symptoms: unremarkable

**IMPRESSION : T4N1 Stage IVA Supraglottic Ca**

Chest x-ray and labs pending.

Laryngoscopy/Biopsy scheduled

Computerized tomography scheduled.

**PRIMARY DIAGNOSIS: Supraglottic squamous cell carcinoma**

Date \_\_\_\_\_

***Adult Comorbidity Evaluation-27***

Coder's Initials \_\_\_\_\_

Identify the important medical comorbidities and grade severity using the index.  
Overall Comorbidity Score is defined according to the highest ranked single ailment,  
except in the case where two or more Grade 2 ailments occur in different organ systems.  
In this situation, the overall comorbidity score should be designated Grade 3.

Oncology Center \_\_\_\_\_

Accession # \_\_\_\_\_ Scenario #1 \_\_\_\_\_

| <b>Cogent comorbid ailment</b>   | <b>Grade 3<br/>Severe Decompensation</b>                                                                                                                                                                                                                                                                                                                                                                               | <b>Grade 2<br/>Moderate Decompensation</b>                                                                                                                                                                                     | <b>Grade 1<br/>Mild Decompensation</b>                                                                                                                                                                                                                                                                  |
|----------------------------------|------------------------------------------------------------------------------------------------------------------------------------------------------------------------------------------------------------------------------------------------------------------------------------------------------------------------------------------------------------------------------------------------------------------------|--------------------------------------------------------------------------------------------------------------------------------------------------------------------------------------------------------------------------------|---------------------------------------------------------------------------------------------------------------------------------------------------------------------------------------------------------------------------------------------------------------------------------------------------------|
| <b>Cardiovascular System</b>     |                                                                                                                                                                                                                                                                                                                                                                                                                        |                                                                                                                                                                                                                                |                                                                                                                                                                                                                                                                                                         |
| Myocardial Infarct               | <input type="checkbox"/> MI ≤ 6 months                                                                                                                                                                                                                                                                                                                                                                                 | <input type="checkbox"/> MI > 6 months ago                                                                                                                                                                                     | <input type="checkbox"/> MI by ECG only, age undetermined                                                                                                                                                                                                                                               |
| Angina / Coronary Artery Disease | <input type="checkbox"/> Unstable angina                                                                                                                                                                                                                                                                                                                                                                               | <input type="checkbox"/> Chronic exertional angina<br><input type="checkbox"/> Recent (≤ 6 months) CABG or PTCA<br><input type="checkbox"/> Recent (≤ 6 months) coronary stent                                                 | <input type="checkbox"/> ECG or stress test evidence or catheterization evidence of coronary disease without symptoms<br><input type="checkbox"/> Angina pectoris not requiring hospitalization<br><input type="checkbox"/> CABG or PTCA (>6 mos.)<br><input type="checkbox"/> Coronary stent (>6 mos.) |
| Congestive Heart Failure         | <input type="checkbox"/> Hospitalized for CHF within past 6 months<br><input type="checkbox"/> Ejection fraction < 20%                                                                                                                                                                                                                                                                                                 | <input type="checkbox"/> Hospitalized for CHF >6 months prior<br><input type="checkbox"/> CHF with dyspnea which limits activities                                                                                             | <input type="checkbox"/> CHF with dyspnea which has responded to treatment<br><input type="checkbox"/> Exertional dyspnea<br><input type="checkbox"/> PND                                                                                                                                               |
| Arrhythmias                      | <input type="checkbox"/> Ventricular arrhythmia ≤ 6 months                                                                                                                                                                                                                                                                                                                                                             | <input type="checkbox"/> Ventricular arrhythmia > 6 months ago<br><input type="checkbox"/> Chronic atrial fibrillation or flutter<br><input type="checkbox"/> Pacemaker                                                        | <input type="checkbox"/> Sick Sinus Syndrome                                                                                                                                                                                                                                                            |
| Hypertension                     | <input type="checkbox"/> DBP ≥ 130 mm Hg<br><input type="checkbox"/> Severe malignant papilledema or other eye changes<br><input type="checkbox"/> Encephalopathy                                                                                                                                                                                                                                                      | <input type="checkbox"/> DBP 115-129 mm Hg<br><input type="checkbox"/> DBP 90-114 mm Hg while taking antihypertensive medications<br><input type="checkbox"/> Secondary cardiovascular symptoms: vertigo, epistaxis, headaches | <input type="checkbox"/> DBP 90-114 mm Hg while <u>not</u> taking antihypertensive medications<br><input checked="" type="checkbox"/> DBP < 90 mm Hg while taking antihypertensive medications<br><input type="checkbox"/> Hypertension NOS                                                             |
| Venous Disease                   | <input type="checkbox"/> Recent PE (≤ 6 mos.)<br><input type="checkbox"/> Use of venous filter for PE's                                                                                                                                                                                                                                                                                                                | <input checked="" type="checkbox"/> DVT controlled with Coumadin or heparin<br><input type="checkbox"/> Old PE > 6mos                                                                                                          | <input type="checkbox"/> Old DVT no longer treated with Coumadin or Heparin                                                                                                                                                                                                                             |
| Peripheral Arterial Disease      | <input type="checkbox"/> Bypass or amputation for gangrene or arterial insufficiency < 6 months ago<br><input type="checkbox"/> Untreated thoracic or abdominal aneurysm (≥ 6 cm)                                                                                                                                                                                                                                      | <input type="checkbox"/> Bypass or amputation for gangrene or arterial insufficiency > 6 months ago<br><input type="checkbox"/> Chronic insufficiency                                                                          | <input type="checkbox"/> Intermittent claudication<br><input type="checkbox"/> Untreated thoracic or abdominal aneurysm (< 6 cm)<br><input type="checkbox"/> s/p abdominal or thoracic aortic aneurysm repair                                                                                           |
| <b>Respiratory System</b>        |                                                                                                                                                                                                                                                                                                                                                                                                                        |                                                                                                                                                                                                                                |                                                                                                                                                                                                                                                                                                         |
|                                  | <input type="checkbox"/> Marked pulmonary insufficiency<br><input type="checkbox"/> Restrictive Lung Disease or COPD with dyspnea at rest despite treatment<br><input type="checkbox"/> Chronic supplemental O <sub>2</sub><br><input type="checkbox"/> CO <sub>2</sub> retention (pCO <sub>2</sub> > 50 torr)<br><input type="checkbox"/> Baseline pO <sub>2</sub> < 50 torr<br><input type="checkbox"/> FEV1 (< 50%) | <input type="checkbox"/> Restrictive Lung Disease or COPD (chronic bronchitis, emphysema, or asthma) with dyspnea which limits activities<br><input type="checkbox"/> FEV1 (51%-65%)                                           | <input type="checkbox"/> Restrictive Lung Disease or COPD (chronic bronchitis, emphysema, or asthma) with dyspnea which has responded to treatment<br><input type="checkbox"/> FEV1 (66%-80%)                                                                                                           |
| <b>Gastrointestinal System</b>   |                                                                                                                                                                                                                                                                                                                                                                                                                        |                                                                                                                                                                                                                                |                                                                                                                                                                                                                                                                                                         |
| Hepatic                          | <input type="checkbox"/> Portal hypertension and/or esophageal bleeding ≤ 6 mos. (Encephalopathy, Ascites, Jaundice with Total Bilirubin > 2)                                                                                                                                                                                                                                                                          | <input type="checkbox"/> Chronic hepatitis, cirrhosis, portal hypertension with moderate symptoms "compensated hepatic failure"                                                                                                | <input type="checkbox"/> Chronic hepatitis or cirrhosis without portal hypertension<br><input type="checkbox"/> Chronic liver disease manifested on biopsy or persistently elevated bilirubin (>3 mg/dl)                                                                                                |
| Stomach / Intestine              | <input type="checkbox"/> Recent ulcers (≤ 6 months ago) requiring blood transfusion                                                                                                                                                                                                                                                                                                                                    | <input type="checkbox"/> Ulcers requiring surgery or transfusion > 6 months ago                                                                                                                                                | <input type="checkbox"/> Diagnosis of ulcers treated with meds<br><input type="checkbox"/> Chronic malabsorption syndrome<br><input type="checkbox"/> Inflammatory bowel disease (IBD) on meds or h/o with complications and/or surgery                                                                 |
| Pancreas                         | <input type="checkbox"/> Acute or chronic pancreatitis with major complications (phlegmon, abscess, or pseudocyst)                                                                                                                                                                                                                                                                                                     | <input type="checkbox"/> Uncomplicated acute pancreatitis<br><input type="checkbox"/> Chronic pancreatitis with minor complications (malabsorption, impaired glucose tolerance, or GI bleeding)                                | <input type="checkbox"/> Chronic pancreatitis w/o complications                                                                                                                                                                                                                                         |

| <b>Cogent comorbid ailment</b> | <b>Grade 3<br/>Severe Decompensation</b>                                                                                                                                                                                                                                                                                                                  | <b>Grade 2<br/>Moderate Decompensation</b>                                                                                                     | <b>Grade 1<br/>Mild Decompensation</b>                                                                                                                   |
|--------------------------------|-----------------------------------------------------------------------------------------------------------------------------------------------------------------------------------------------------------------------------------------------------------------------------------------------------------------------------------------------------------|------------------------------------------------------------------------------------------------------------------------------------------------|----------------------------------------------------------------------------------------------------------------------------------------------------------|
| <b>Renal System</b>            |                                                                                                                                                                                                                                                                                                                                                           |                                                                                                                                                |                                                                                                                                                          |
| End-stage renal disease        | <input type="checkbox"/> Creatinine > 3 mg% with multi-organ failure, shock, or sepsis<br><input type="checkbox"/> Acute dialysis                                                                                                                                                                                                                         | <input type="checkbox"/> Chronic Renal Insufficiency with creatinine >3 mg%<br><input type="checkbox"/> Chronic dialysis                       | <input type="checkbox"/> Chronic Renal Insufficiency with creatinine 2-3 mg%.                                                                            |
| <b>Endocrine System</b>        | <b>(Code the comorbid ailments with the (*) in both the Endocrine system and other organ systems if applicable)</b>                                                                                                                                                                                                                                       |                                                                                                                                                |                                                                                                                                                          |
| Diabetes Mellitus              | <input type="checkbox"/> Hospitalization ≤ 6 months for DKA<br><input type="checkbox"/> Diabetes causing end-organ failure<br><input type="checkbox"/> retinopathy<br><input type="checkbox"/> neuropathy<br><input type="checkbox"/> nephropathy*<br><input type="checkbox"/> coronary disease*<br><input type="checkbox"/> peripheral arterial disease* | <input checked="" type="checkbox"/> IDDM without complications<br><input type="checkbox"/> Poorly controlled AODM with oral agents             | <input type="checkbox"/> AODM controlled by oral agents only                                                                                             |
| <b>Neurological System</b>     |                                                                                                                                                                                                                                                                                                                                                           |                                                                                                                                                |                                                                                                                                                          |
| Stroke                         | <input type="checkbox"/> Acute stroke with coma or significant neurologic deficit                                                                                                                                                                                                                                                                         | <input type="checkbox"/> Old stroke with neurologic residua                                                                                    | <input type="checkbox"/> Stroke with no residual<br><input type="checkbox"/> Past or recent TIA                                                          |
| Dementia                       | <input type="checkbox"/> Severe dementia requiring full support for activities of daily living                                                                                                                                                                                                                                                            | <input type="checkbox"/> Moderate dementia (not completely self-sufficient, needs supervising)                                                 | <input type="checkbox"/> Mild dementia (can take care of self)                                                                                           |
| Paralysis                      | <input type="checkbox"/> Paraplegia or hemiplegia requiring full support for activities of daily living                                                                                                                                                                                                                                                   | <input type="checkbox"/> Paraplegia or hemiplegia requiring wheelchair, but able to do some self care                                          | <input type="checkbox"/> Paraplegia or hemiplegia but ambulatory and providing most of self care                                                         |
| Neuromuscular                  | <input type="checkbox"/> MS, Parkinson's or other chronic neuromuscular disorder and requiring full support for activities of daily living                                                                                                                                                                                                                | <input type="checkbox"/> MS, Parkinson's, or other chronic neuromuscular disorder, but able to do some self care                               | <input type="checkbox"/> MS, Parkinson's, or other chronic neuromuscular disorder, but ambulatory and providing most of self care                        |
| <b>Psychiatric</b>             |                                                                                                                                                                                                                                                                                                                                                           |                                                                                                                                                |                                                                                                                                                          |
|                                | <input type="checkbox"/> Recent suicidal attempt<br><input type="checkbox"/> Active schizophrenia                                                                                                                                                                                                                                                         | <input type="checkbox"/> Depression or bipolar disorder uncontrolled<br><input type="checkbox"/> Schizophrenia controlled with medication      | <input checked="" type="checkbox"/> Depression or bipolar disorder controlled w/ medication                                                              |
| <b>Rheumatologic</b>           | <b>(Including Rheumatoid Arthritis, Systemic Lupus, Mixed Connective Tissue Disorder, Polymyositis, Rheumatic Polymyositis)</b>                                                                                                                                                                                                                           |                                                                                                                                                |                                                                                                                                                          |
|                                | <input type="checkbox"/> Connective Tissue Disorder with secondary end-organ failure (renal, cardiac, CNS)                                                                                                                                                                                                                                                | <input type="checkbox"/> Connective Tissue Disorder on steroids or immunosuppressant medications                                               | <input type="checkbox"/> Connective Tissue Disorder on NSAIDS or no treatment                                                                            |
| <b>Immunological System</b>    |                                                                                                                                                                                                                                                                                                                                                           |                                                                                                                                                |                                                                                                                                                          |
| AIDS                           | <input type="checkbox"/> Fulminant AIDS w/KS, MAI, PCP (AIDS defining illness)                                                                                                                                                                                                                                                                            | <input type="checkbox"/> HIV+ with h/o defining illness. CD4 <sup>+</sup> < 200/μL                                                             | <input type="checkbox"/> Asymptomatic HIV+ patient.<br><input type="checkbox"/> HIV <sup>+</sup> w/o h/o AIDS defining illness. CD4 <sup>+</sup> > 200μL |
| <b>Malignancy</b>              | <b>(Excluding Cutaneous Basal Cell Ca., Cutaneous SCCA, Carcinoma in-situ, and Intraepithelial Neoplasm)</b>                                                                                                                                                                                                                                              |                                                                                                                                                |                                                                                                                                                          |
| Solid Tumor including melanoma | <input type="checkbox"/> Uncontrolled cancer<br><input type="checkbox"/> Newly diagnosed but not yet treated<br><input type="checkbox"/> Metastatic solid tumor                                                                                                                                                                                           | <input type="checkbox"/> Any controlled solid tumor without documented metastases, but initially diagnosed and treated within the last 5 years | <input type="checkbox"/> Any controlled solid tumor without documented metastases, but initially diagnosed and treated > 5 years ago                     |
| Leukemia                       | <input type="checkbox"/> Relapse                                                                                                                                                                                                                                                                                                                          | <input type="checkbox"/> 1 <sup>st</sup> remission or new dx <1yr<br><input type="checkbox"/> Chronic suppressive therapy                      | <input type="checkbox"/> H/o leukemia with last Rx > 1 yr prior                                                                                          |
| Lymphoma including Myeloma     | <input type="checkbox"/> Relapse                                                                                                                                                                                                                                                                                                                          | <input type="checkbox"/> 1 <sup>st</sup> remission or new dx <1yr<br><input type="checkbox"/> Chronic suppressive therapy                      | <input type="checkbox"/> H/o lymphoma w/ last Rx >1 yr prior                                                                                             |
| <b>Substance Abuse</b>         |                                                                                                                                                                                                                                                                                                                                                           |                                                                                                                                                |                                                                                                                                                          |
| Alcohol                        | <input type="checkbox"/> Delirium tremens                                                                                                                                                                                                                                                                                                                 | <input type="checkbox"/> Active alcohol abuse with social, behavioral, or medical complications                                                | <input type="checkbox"/> H/o alcohol abuse but not presently drinking                                                                                    |
| Illicit Drugs                  | <input type="checkbox"/> Acute Withdrawal Syndrome                                                                                                                                                                                                                                                                                                        | <input type="checkbox"/> Active substance abuse with social, behavioral, or medical complications                                              | <input type="checkbox"/> H/o substance abuse but not presently using                                                                                     |
| <b>Body Weight</b>             |                                                                                                                                                                                                                                                                                                                                                           |                                                                                                                                                |                                                                                                                                                          |
| Obesity                        |                                                                                                                                                                                                                                                                                                                                                           | <input type="checkbox"/> Morbid (i.e., BMI ≥ 38)                                                                                               |                                                                                                                                                          |

**OVERALL COMORBIDITY SCORE     3**

## **SCENARIO #2**

**DATE:** February 27, 1999

**CHIEF COMPLAINT:** Asymptomatic patient with positive chest x-ray, referred by his primary care physician to this office for further management and treatment.

**HISTORY OF PRESENT ILLNESS:** 45 year old male, works for the post-office. He presented 6 months ago with weakness in his arms and legs, shortness of breath and was hospitalized and treated for Eaton-Lambert syndrome. He comes to the office referred by his primary care physician after chest x-ray showed a suspicious lung mass. He denies shortness of breath, hemoptysis, dyspnea, weight loss, anorexia, fever, or chills. He reports having a constant cough for the past two months that has been treated with antibiotics without relief.

### **PAST MEDICAL HISTORY:**

Surgical History: Tonsillectomy and Adenoidectomy as a child.

Motor vehicle accident- multiple fractures repaired (12 years ago)

Medical History: Eaton-Lambert Syndrome diagnosed 6 months ago, patient was hospitalized and treated with plasmapheresis and immunotherapy. His primary care physician frequently sees him for follow-up on his condition.

Medications: None

**SOCIAL HISTORY:** Patient is a heavy smoker since age 13. Smokes approximately 2 packs per day. Drinks a six pack a day and 1-2 highballs on weekends.

**FAMILY HISTORY:** Father died of oral cavity cancer at age 65.

**PHYSICAL EXAM :** 45 year old male. BP 120/85, Temperature 37.5 C, Pulse 88.

Extraocular movement: full

Head, eyes, ears, nose, and throat: Negative

Heart: normal sinus rhythm, no murmurs.

Abdomen: Soft, non tender.

Neurologic: Deep tendon reflexes absent, proximal weakness in legs, arms and pelvic girdle remain. Cranial nerves exam - Negative

Lungs: Slight wheezing heard over right lung otherwise exam is normal.

### **DIAGNOSTIC TESTS :**

**Chest x-ray:** Solitary pulmonary nodule.

**IMPRESSION :** Rule out **Carcinoma of the Lung.**

Bronchoscopy scheduled

CTR scheduled.

**PRIMARY DIAGNOSIS: Carcinoma of the lung**

Date \_\_\_\_\_

Coder's Initials \_\_\_\_\_

Oncology Center \_\_\_\_\_

Accession # Scenario #2

**Adult Comorbidity Evaluation-27**

Identify the important medical comorbidities and grade severity using the index.

Overall Comorbidity Score is defined according to the highest ranked single ailment, except in the case where two or more Grade 2 ailments occur in different organ systems. In this situation, the overall comorbidity score should be designated Grade 3.

| Cogent comorbid ailment          | Grade 3<br>Severe Decompensation                                                                                                                                                                                                                                                                                                                                                                                       | Grade 2<br>Moderate Decompensation                                                                                                                                                                                             | Grade 1<br>Mild Decompensation                                                                                                                                                                                                                                                                          |
|----------------------------------|------------------------------------------------------------------------------------------------------------------------------------------------------------------------------------------------------------------------------------------------------------------------------------------------------------------------------------------------------------------------------------------------------------------------|--------------------------------------------------------------------------------------------------------------------------------------------------------------------------------------------------------------------------------|---------------------------------------------------------------------------------------------------------------------------------------------------------------------------------------------------------------------------------------------------------------------------------------------------------|
| <b>Cardiovascular System</b>     |                                                                                                                                                                                                                                                                                                                                                                                                                        |                                                                                                                                                                                                                                |                                                                                                                                                                                                                                                                                                         |
| Myocardial Infarct               | <input type="checkbox"/> MI $\leq$ 6 months                                                                                                                                                                                                                                                                                                                                                                            | <input type="checkbox"/> MI > 6 months ago                                                                                                                                                                                     | <input type="checkbox"/> MI by ECG only, age undetermined                                                                                                                                                                                                                                               |
| Angina / Coronary Artery Disease | <input type="checkbox"/> Unstable angina                                                                                                                                                                                                                                                                                                                                                                               | <input type="checkbox"/> Chronic exertional angina<br><input type="checkbox"/> Recent ( $\leq$ 6 months) CABG or PTCA<br><input type="checkbox"/> Recent ( $\leq$ 6 months) coronary stent                                     | <input type="checkbox"/> ECG or stress test evidence or catheterization evidence of coronary disease without symptoms<br><input type="checkbox"/> Angina pectoris not requiring hospitalization<br><input type="checkbox"/> CABG or PTCA (>6 mos.)<br><input type="checkbox"/> Coronary stent (>6 mos.) |
| Congestive Heart Failure         | <input type="checkbox"/> Hospitalized for CHF within past 6 months<br><input type="checkbox"/> Ejection fraction < 20%                                                                                                                                                                                                                                                                                                 | <input type="checkbox"/> Hospitalized for CHF >6 months prior<br><input type="checkbox"/> CHF with dyspnea which limits activities                                                                                             | <input type="checkbox"/> CHF with dyspnea which has responded to treatment<br><input type="checkbox"/> Exertional dyspnea<br><input type="checkbox"/> PND                                                                                                                                               |
| Arrhythmias                      | <input type="checkbox"/> Ventricular arrhythmia $\leq$ 6 months                                                                                                                                                                                                                                                                                                                                                        | <input type="checkbox"/> Ventricular arrhythmia > 6 months ago<br><input type="checkbox"/> Chronic atrial fibrillation or flutter<br><input type="checkbox"/> Pacemaker                                                        | <input type="checkbox"/> Sick Sinus Syndrome                                                                                                                                                                                                                                                            |
| Hypertension                     | <input type="checkbox"/> DBP $\geq$ 130 mm Hg<br><input type="checkbox"/> Severe malignant papilledema or other eye changes<br><input type="checkbox"/> Encephalopathy                                                                                                                                                                                                                                                 | <input type="checkbox"/> DBP 115-129 mm Hg<br><input type="checkbox"/> DBP 90-114 mm Hg while taking antihypertensive medications<br><input type="checkbox"/> Secondary cardiovascular symptoms: vertigo, epistaxis, headaches | <input type="checkbox"/> DBP 90-114 mm Hg while <u>not</u> taking antihypertensive medications<br><input type="checkbox"/> DBP < 90 mm Hg while taking antihypertensive medications<br><input type="checkbox"/> Hypertension NOS                                                                        |
| Venous Disease                   | <input type="checkbox"/> Recent PE ( $\leq$ 6 mos.)<br><input type="checkbox"/> Use of venous filter for PE's                                                                                                                                                                                                                                                                                                          | <input type="checkbox"/> DVT controlled with Coumadin or heparin<br><input type="checkbox"/> Old PE > 6mos                                                                                                                     | <input type="checkbox"/> Old DVT no longer treated with Coumadin or Heparin                                                                                                                                                                                                                             |
| Peripheral Arterial Disease      | <input type="checkbox"/> Bypass or amputation for gangrene or arterial insufficiency < 6 months ago<br><input type="checkbox"/> Untreated thoracic or abdominal aneurysm ( $\geq$ 6 cm)                                                                                                                                                                                                                                | <input type="checkbox"/> Bypass or amputation for gangrene or arterial insufficiency > 6 months ago<br><input type="checkbox"/> Chronic insufficiency                                                                          | <input type="checkbox"/> Intermittent claudication<br><input type="checkbox"/> Untreated thoracic or abdominal aneurysm (< 6 cm)<br><input type="checkbox"/> s/p abdominal or thoracic aortic aneurysm repair                                                                                           |
| <b>Respiratory System</b>        |                                                                                                                                                                                                                                                                                                                                                                                                                        |                                                                                                                                                                                                                                |                                                                                                                                                                                                                                                                                                         |
|                                  | <input type="checkbox"/> Marked pulmonary insufficiency<br><input type="checkbox"/> Restrictive Lung Disease or COPD with dyspnea at rest despite treatment<br><input type="checkbox"/> Chronic supplemental O <sub>2</sub><br><input type="checkbox"/> CO <sub>2</sub> retention (pCO <sub>2</sub> > 50 torr)<br><input type="checkbox"/> Baseline pO <sub>2</sub> < 50 torr<br><input type="checkbox"/> FEV1 (< 50%) | <input type="checkbox"/> Restrictive Lung Disease or COPD (chronic bronchitis, emphysema, or asthma) with dyspnea which limits activities<br><input type="checkbox"/> FEV1 (51%-65%)                                           | <input type="checkbox"/> Restrictive Lung Disease or COPD (chronic bronchitis, emphysema, or asthma) with dyspnea which has responded to treatment<br><input type="checkbox"/> FEV1 (66%-80%)                                                                                                           |
| <b>Gastrointestinal System</b>   |                                                                                                                                                                                                                                                                                                                                                                                                                        |                                                                                                                                                                                                                                |                                                                                                                                                                                                                                                                                                         |
| Hepatic                          | <input type="checkbox"/> Portal hypertension and/or esophageal bleeding $\leq$ 6 mos. (Encephalopathy, Ascites, Jaundice with Total Bilirubin > 2)                                                                                                                                                                                                                                                                     | <input type="checkbox"/> Chronic hepatitis, cirrhosis, portal hypertension with moderate symptoms "compensated hepatic failure"                                                                                                | <input type="checkbox"/> Chronic hepatitis or cirrhosis without portal hypertension<br><input type="checkbox"/> Chronic liver disease manifested on biopsy or persistently elevated bilirubin (>3 mg/dl)                                                                                                |
| Stomach / Intestine              | <input type="checkbox"/> Recent ulcers ( $\leq$ 6 months ago) requiring blood transfusion                                                                                                                                                                                                                                                                                                                              | <input type="checkbox"/> Ulcers requiring surgery or transfusion > 6 months ago                                                                                                                                                | <input type="checkbox"/> Diagnosis of ulcers treated with meds<br><input type="checkbox"/> Chronic malabsorption syndrome<br><input type="checkbox"/> Inflammatory bowel disease (IBD) on meds or h/o with complications and/or surgery                                                                 |
| Pancreas                         | <input type="checkbox"/> Acute or chronic pancreatitis with major complications (phlegmon, abscess, or pseudocyst)                                                                                                                                                                                                                                                                                                     | <input type="checkbox"/> Uncomplicated acute pancreatitis<br><input type="checkbox"/> Chronic pancreatitis with minor complications (malabsorption, impaired glucose tolerance, or GI bleeding)                                | <input type="checkbox"/> Chronic pancreatitis w/o complications                                                                                                                                                                                                                                         |

| <b>Cogent comorbid ailment</b> | <b>Grade 3<br/>Severe Decompensation</b>                                                                                                                                                                                                                                                                                                                  | <b>Grade 2<br/>Moderate Decompensation</b>                                                                                                     | <b>Grade 1<br/>Mild Decompensation</b>                                                                                                                   |
|--------------------------------|-----------------------------------------------------------------------------------------------------------------------------------------------------------------------------------------------------------------------------------------------------------------------------------------------------------------------------------------------------------|------------------------------------------------------------------------------------------------------------------------------------------------|----------------------------------------------------------------------------------------------------------------------------------------------------------|
| <b>Renal System</b>            |                                                                                                                                                                                                                                                                                                                                                           |                                                                                                                                                |                                                                                                                                                          |
| End-stage renal disease        | <input type="checkbox"/> Creatinine > 3 mg% with multi-organ failure, shock, or sepsis<br><input type="checkbox"/> Acute dialysis                                                                                                                                                                                                                         | <input type="checkbox"/> Chronic Renal Insufficiency with creatinine >3 mg%<br><input type="checkbox"/> Chronic dialysis                       | <input type="checkbox"/> Chronic Renal Insufficiency with creatinine 2-3 mg%.                                                                            |
| <b>Endocrine System</b>        | <b>(Code the comorbid ailments with the (*) in both the Endocrine system and other organ systems if applicable)</b>                                                                                                                                                                                                                                       |                                                                                                                                                |                                                                                                                                                          |
| Diabetes Mellitus              | <input type="checkbox"/> Hospitalization ≤ 6 months for DKA<br><input type="checkbox"/> Diabetes causing end-organ failure<br><input type="checkbox"/> retinopathy<br><input type="checkbox"/> neuropathy<br><input type="checkbox"/> nephropathy*<br><input type="checkbox"/> coronary disease*<br><input type="checkbox"/> peripheral arterial disease* | <input type="checkbox"/> IDDM without complications<br><input type="checkbox"/> Poorly controlled AODM with oral agents                        | <input type="checkbox"/> AODM controlled by oral agents only                                                                                             |
| <b>Neurological System</b>     |                                                                                                                                                                                                                                                                                                                                                           |                                                                                                                                                |                                                                                                                                                          |
| Stroke                         | <input type="checkbox"/> Acute stroke with coma or significant neurologic deficit                                                                                                                                                                                                                                                                         | <input type="checkbox"/> Old stroke with neurologic residua                                                                                    | <input type="checkbox"/> Stroke with no residual<br><input type="checkbox"/> Past or recent TIA                                                          |
| Dementia                       | <input type="checkbox"/> Severe dementia requiring full support for activities of daily living                                                                                                                                                                                                                                                            | <input type="checkbox"/> Moderate dementia (not completely self-sufficient, needs supervising)                                                 | <input type="checkbox"/> Mild dementia (can take care of self)                                                                                           |
| Paralysis                      | <input type="checkbox"/> Paraplegia or hemiplegia requiring full support for activities of daily living                                                                                                                                                                                                                                                   | <input type="checkbox"/> Paraplegia or hemiplegia requiring wheelchair, but able to do some self care                                          | <input type="checkbox"/> Paraplegia or hemiplegia but ambulatory and providing most of self care                                                         |
| Neuromuscular                  | <input type="checkbox"/> MS, Parkinson's or other chronic neuromuscular disorder and requiring full support for activities of daily living                                                                                                                                                                                                                | <input type="checkbox"/> MS, Parkinson's, or other chronic neuromuscular disorder, but able to do some self care                               | <input type="checkbox"/> MS, Parkinson's, or other chronic neuromuscular disorder, but ambulatory and providing most of self care                        |
| <b>Psychiatric</b>             |                                                                                                                                                                                                                                                                                                                                                           |                                                                                                                                                |                                                                                                                                                          |
|                                | <input type="checkbox"/> Recent suicidal attempt<br><input type="checkbox"/> Active schizophrenia                                                                                                                                                                                                                                                         | <input type="checkbox"/> Depression or bipolar disorder uncontrolled<br><input type="checkbox"/> Schizophrenia controlled with medication      | <input type="checkbox"/> Depression or bipolar disorder controlled w/ medication                                                                         |
| <b>Rheumatologic</b>           | <b>(Including Rheumatoid Arthritis, Systemic Lupus, Mixed Connective Tissue Disorder, Polymyositis, Rheumatic Polymyositis)</b>                                                                                                                                                                                                                           |                                                                                                                                                |                                                                                                                                                          |
|                                | <input type="checkbox"/> Connective Tissue Disorder with secondary end-organ failure (renal, cardiac, CNS)                                                                                                                                                                                                                                                | <input type="checkbox"/> Connective Tissue Disorder on steroids or immunosuppressant medications                                               | <input type="checkbox"/> Connective Tissue Disorder on NSAIDS or no treatment                                                                            |
| <b>Immunological System</b>    |                                                                                                                                                                                                                                                                                                                                                           |                                                                                                                                                |                                                                                                                                                          |
| AIDS                           | <input type="checkbox"/> Fulminant AIDS w/KS, MAI, PCP (AIDS defining illness)                                                                                                                                                                                                                                                                            | <input type="checkbox"/> HIV+ with h/o defining illness. CD4 <sup>+</sup> < 200/μL                                                             | <input type="checkbox"/> Asymptomatic HIV+ patient.<br><input type="checkbox"/> HIV <sup>+</sup> w/o h/o AIDS defining illness. CD4 <sup>+</sup> > 200μL |
| <b>Malignancy</b>              | <b>(Excluding Cutaneous Basal Cell Ca., Cutaneous SCCA, Carcinoma in-situ, and Intraepithelial Neoplasm)</b>                                                                                                                                                                                                                                              |                                                                                                                                                |                                                                                                                                                          |
| Solid Tumor including melanoma | <input type="checkbox"/> Uncontrolled cancer<br><input type="checkbox"/> Newly diagnosed but not yet treated<br><input type="checkbox"/> Metastatic solid tumor                                                                                                                                                                                           | <input type="checkbox"/> Any controlled solid tumor without documented metastases, but initially diagnosed and treated within the last 5 years | <input type="checkbox"/> Any controlled solid tumor without documented metastases, but initially diagnosed and treated > 5 years ago                     |
| Leukemia                       | <input type="checkbox"/> Relapse                                                                                                                                                                                                                                                                                                                          | <input type="checkbox"/> 1 <sup>st</sup> remission or new dx <1yr<br><input type="checkbox"/> Chronic suppressive therapy                      | <input type="checkbox"/> H/o leukemia with last Rx > 1 yr prior                                                                                          |
| Lymphoma including Myeloma     | <input type="checkbox"/> Relapse                                                                                                                                                                                                                                                                                                                          | <input type="checkbox"/> 1 <sup>st</sup> remission or new dx <1yr<br><input type="checkbox"/> Chronic suppressive therapy                      | <input type="checkbox"/> H/o lymphoma w/ last Rx >1 yr prior                                                                                             |
| <b>Substance Abuse</b>         |                                                                                                                                                                                                                                                                                                                                                           |                                                                                                                                                |                                                                                                                                                          |
| Alcohol                        | <input type="checkbox"/> Delirium tremens                                                                                                                                                                                                                                                                                                                 | <input type="checkbox"/> Active alcohol abuse with social, behavioral, or medical complications                                                | <input type="checkbox"/> H/o alcohol abuse but not presently drinking                                                                                    |
| Illicit Drugs                  | <input type="checkbox"/> Acute Withdrawal Syndrome                                                                                                                                                                                                                                                                                                        | <input type="checkbox"/> Active substance abuse with social, behavioral, or medical complications                                              | <input type="checkbox"/> H/o substance abuse but not presently using                                                                                     |
| <b>Body Weight</b>             |                                                                                                                                                                                                                                                                                                                                                           |                                                                                                                                                |                                                                                                                                                          |
| Obesity                        |                                                                                                                                                                                                                                                                                                                                                           | <input type="checkbox"/> Morbid (i.e., BMI ≥ 38)                                                                                               |                                                                                                                                                          |

**OVERALL COMORBIDITY SCORE     0**

## **SCENARIO # 3**

**DATE:** December 4, 1998

**CHIEF COMPLAINT:** 48 year old male complains of increasing abdominal pain.

**HISTORY OF PRESENT ILLNESS:** 48-year old male who works for the city laying asphalt for streets. He complains that for the past four days he has been having abdominal pain that seems to increase after meals, but is not relieved with antacids. The pain is localized and of sharp quality over the left epigastric area, with some irradiation to his right. Presents today to the emergency room because the pain got unbearable and is now associated with nausea, but no vomiting. He says he has lost approximately 6 lbs in the last 5 days because he doesn't feel like eating and always feels full. Denies hematemesis, shortness of breath, fever, chills, diaphoresis, or shoulder pain.

### **PAST MEDICAL HISTORY:**

Surgical History: Hernia repair in 1966 while in the service. Appendectomy at age 13.

Medical History: Chronic ulcers, chronic obstructive pulmonary disease

Medications: Zantac

Allergies: NKDA

**SOCIAL HISTORY:** Smoker of 2 packs per day for the last 30 years. Heavy drinker. Drinks approx 8-10 beers during the week and a ½ of vodka on weekends. Hospitalized in 1995 for drinking problem.

**FAMILY HISTORY:** Father died of lung cancer at age 65. Mother alive, mild hypertension. No siblings.

**PHYSICAL EXAM :** BP: 130/85, RR 30, Temperature 38 C, Pulse 98, Weight 175 lbs, Height 5'10".

Head, eyes, ears, nose, and throat: Unremarkable

Heart: normal sinus rhythm, no gallops, murmurs, or thrills.

Lungs: Ronchi over left lobe. Some wheezing over the right middle and lower lobes.

Abdomen. Left lower quadrant of abdomen scar consistent with hernia repair. + BS.

Mild tenderness to palpation over entire epigastric area, but no guarding. Gross hepatomegaly 4+ with nodular consistency to palpation and which seems to expand to the left epigastric quadrant. No signs of ascites.

Neuro: Cranial nerves 2-12 Intact.

### **LABORATORY RESULTS:**

Chest x-ray: Large left hilar mass which seems to extend to the mediastinum. Right lower lobe appears congested. Chronic obstructive pulmonary disease changes are present.

Abdominal CT scan: Hepatomegaly. Multiple palpable masses throughout the liver consistent with liver mets.

**IMPRESSION : Lung Carcinoma with liver metastasis**

**PRIMARY DIAGNOSIS: Stage IV Lung carcinoma**



Date \_\_\_\_\_

***Adult Comorbidity Evaluation-27***

Coder's Initials \_\_\_\_\_

Identify the important medical comorbidities and grade severity using the index.

Oncology Center \_\_\_\_\_

Overall Comorbidity Score is defined according to the highest ranked single ailment, except in the case where two or more Grade 2 ailments occur in different organ systems.

Accession # \_Scenario #3\_

In this situation, the overall comorbidity score should be designated Grade 3.

| <b>Cogent comorbid ailment</b>   | <b>Grade 3<br/>Severe Decompensation</b>                                                                                                                                                                                                                                                                                                                                                                               | <b>Grade 2<br/>Moderate Decompensation</b>                                                                                                                                                                                     | <b>Grade 1<br/>Mild Decompensation</b>                                                                                                                                                                                                                                                                  |
|----------------------------------|------------------------------------------------------------------------------------------------------------------------------------------------------------------------------------------------------------------------------------------------------------------------------------------------------------------------------------------------------------------------------------------------------------------------|--------------------------------------------------------------------------------------------------------------------------------------------------------------------------------------------------------------------------------|---------------------------------------------------------------------------------------------------------------------------------------------------------------------------------------------------------------------------------------------------------------------------------------------------------|
| <b>Cardiovascular System</b>     |                                                                                                                                                                                                                                                                                                                                                                                                                        |                                                                                                                                                                                                                                |                                                                                                                                                                                                                                                                                                         |
| Myocardial Infarct               | <input type="checkbox"/> MI ≤ 6 months                                                                                                                                                                                                                                                                                                                                                                                 | <input type="checkbox"/> MI > 6 months ago                                                                                                                                                                                     | <input type="checkbox"/> MI by ECG only, age undetermined                                                                                                                                                                                                                                               |
| Angina / Coronary Artery Disease | <input type="checkbox"/> Unstable angina                                                                                                                                                                                                                                                                                                                                                                               | <input type="checkbox"/> Chronic exertional angina<br><input type="checkbox"/> Recent (≤ 6 months) CABG or PTCA<br><input type="checkbox"/> Recent (≤ 6 months) coronary stent                                                 | <input type="checkbox"/> ECG or stress test evidence or catheterization evidence of coronary disease without symptoms<br><input type="checkbox"/> Angina pectoris not requiring hospitalization<br><input type="checkbox"/> CABG or PTCA (>6 mos.)<br><input type="checkbox"/> Coronary stent (>6 mos.) |
| Congestive Heart Failure         | <input type="checkbox"/> Hospitalized for CHF within past 6 months<br><input type="checkbox"/> Ejection fraction < 20%                                                                                                                                                                                                                                                                                                 | <input type="checkbox"/> Hospitalized for CHF >6 months prior<br><input type="checkbox"/> CHF with dyspnea which limits activities                                                                                             | <input type="checkbox"/> CHF with dyspnea which has responded to treatment<br><input type="checkbox"/> Exertional dyspnea<br><input type="checkbox"/> PND                                                                                                                                               |
| Arrhythmias                      | <input type="checkbox"/> Ventricular arrhythmia ≤ 6 months                                                                                                                                                                                                                                                                                                                                                             | <input type="checkbox"/> Ventricular arrhythmia > 6 months ago<br><input type="checkbox"/> Chronic atrial fibrillation or flutter<br><input type="checkbox"/> Pacemaker                                                        | <input type="checkbox"/> Sick Sinus Syndrome                                                                                                                                                                                                                                                            |
| Hypertension                     | <input type="checkbox"/> DBP ≥ 130 mm Hg<br><input type="checkbox"/> Severe malignant papilledema or other eye changes<br><input type="checkbox"/> Encephalopathy                                                                                                                                                                                                                                                      | <input type="checkbox"/> DBP 115-129 mm Hg<br><input type="checkbox"/> DBP 90-114 mm Hg while taking antihypertensive medications<br><input type="checkbox"/> Secondary cardiovascular symptoms: vertigo, epistaxis, headaches | <input type="checkbox"/> DBP 90-114 mm Hg while <u>not</u> taking antihypertensive medications<br><input type="checkbox"/> DBP < 90 mm Hg while taking antihypertensive medications<br><input type="checkbox"/> Hypertension NOS                                                                        |
| Venous Disease                   | <input type="checkbox"/> Recent PE (≤ 6 mos.)<br><input type="checkbox"/> Use of venous filter for PE's                                                                                                                                                                                                                                                                                                                | <input type="checkbox"/> DVT controlled with Coumadin or heparin<br><input type="checkbox"/> Old PE > 6mos                                                                                                                     | <input type="checkbox"/> Old DVT no longer treated with Coumadin or Heparin                                                                                                                                                                                                                             |
| Peripheral Arterial Disease      | <input type="checkbox"/> Bypass or amputation for gangrene or arterial insufficiency < 6 months ago<br><input type="checkbox"/> Untreated thoracic or abdominal aneurysm (≥ 6 cm)                                                                                                                                                                                                                                      | <input type="checkbox"/> Bypass or amputation for gangrene or arterial insufficiency > 6 months ago<br><input type="checkbox"/> Chronic insufficiency                                                                          | <input type="checkbox"/> Intermittent claudication<br><input type="checkbox"/> Untreated thoracic or abdominal aneurysm (< 6 cm)<br><input type="checkbox"/> s/p abdominal or thoracic aortic aneurysm repair                                                                                           |
| <b>Respiratory System</b>        |                                                                                                                                                                                                                                                                                                                                                                                                                        |                                                                                                                                                                                                                                |                                                                                                                                                                                                                                                                                                         |
|                                  | <input type="checkbox"/> Marked pulmonary insufficiency<br><input type="checkbox"/> Restrictive Lung Disease or COPD with dyspnea at rest despite treatment<br><input type="checkbox"/> Chronic supplemental O <sub>2</sub><br><input type="checkbox"/> CO <sub>2</sub> retention (pCO <sub>2</sub> > 50 torr)<br><input type="checkbox"/> Baseline pO <sub>2</sub> < 50 torr<br><input type="checkbox"/> FEV1 (< 50%) | <input type="checkbox"/> Restrictive Lung Disease or COPD (chronic bronchitis, emphysema, or asthma) with dyspnea which limits activities<br><input type="checkbox"/> FEV1 (51%-65%)                                           | <input checked="" type="checkbox"/> Restrictive Lung Disease or COPD (chronic bronchitis, emphysema, or asthma) with dyspnea which has responded to treatment<br><input type="checkbox"/> FEV1 (66%-80%)                                                                                                |
| <b>Gastrointestinal System</b>   |                                                                                                                                                                                                                                                                                                                                                                                                                        |                                                                                                                                                                                                                                |                                                                                                                                                                                                                                                                                                         |
| Hepatic                          | <input type="checkbox"/> Portal hypertension and/or esophageal bleeding ≤ 6 mos. (Encephalopathy, Ascites, Jaundice with Total Bilirubin > 2)                                                                                                                                                                                                                                                                          | <input type="checkbox"/> Chronic hepatitis, cirrhosis, portal hypertension with moderate symptoms "compensated hepatic failure"                                                                                                | <input type="checkbox"/> Chronic hepatitis or cirrhosis without portal hypertension<br><input type="checkbox"/> Chronic liver disease manifested on biopsy or persistently elevated bilirubin (>3 mg/dl)                                                                                                |
| Stomach / Intestine              | <input type="checkbox"/> Recent ulcers (≤ 6 months ago) requiring blood transfusion                                                                                                                                                                                                                                                                                                                                    | <input type="checkbox"/> Ulcers requiring surgery or transfusion > 6 months ago                                                                                                                                                | <input checked="" type="checkbox"/> Diagnosis of ulcers treated with meds<br><input type="checkbox"/> Chronic malabsorption syndrome<br><input type="checkbox"/> Inflammatory bowel disease (IBD) on meds or h/o with complications and/or surgery                                                      |
| Pancreas                         | <input type="checkbox"/> Acute or chronic pancreatitis with major complications (phlegmon, abscess, or pseudocyst)                                                                                                                                                                                                                                                                                                     | <input type="checkbox"/> Uncomplicated acute pancreatitis<br><input type="checkbox"/> Chronic pancreatitis with minor complications (malabsorption, impaired glucose tolerance, or GI bleeding)                                | <input type="checkbox"/> Chronic pancreatitis w/o complications                                                                                                                                                                                                                                         |

| <b>Cogent comorbid ailment</b> | <b>Grade 3<br/>Severe Decompensation</b>                                                                                                                                                                                                                                                                                                                  | <b>Grade 2<br/>Moderate Decompensation</b>                                                                                                     | <b>Grade 1<br/>Mild Decompensation</b>                                                                                                                   |
|--------------------------------|-----------------------------------------------------------------------------------------------------------------------------------------------------------------------------------------------------------------------------------------------------------------------------------------------------------------------------------------------------------|------------------------------------------------------------------------------------------------------------------------------------------------|----------------------------------------------------------------------------------------------------------------------------------------------------------|
| <b>Renal System</b>            |                                                                                                                                                                                                                                                                                                                                                           |                                                                                                                                                |                                                                                                                                                          |
| End-stage renal disease        | <input type="checkbox"/> Creatinine > 3 mg% with multi-organ failure, shock, or sepsis<br><input type="checkbox"/> Acute dialysis                                                                                                                                                                                                                         | <input type="checkbox"/> Chronic Renal Insufficiency with creatinine >3 mg%<br><input type="checkbox"/> Chronic dialysis                       | <input type="checkbox"/> Chronic Renal Insufficiency with creatinine 2-3 mg%.                                                                            |
| <b>Endocrine System</b>        | <b>(Code the comorbid ailments with the (*) in both the Endocrine system and other organ systems if applicable)</b>                                                                                                                                                                                                                                       |                                                                                                                                                |                                                                                                                                                          |
| Diabetes Mellitus              | <input type="checkbox"/> Hospitalization ≤ 6 months for DKA<br><input type="checkbox"/> Diabetes causing end-organ failure<br><input type="checkbox"/> retinopathy<br><input type="checkbox"/> neuropathy<br><input type="checkbox"/> nephropathy*<br><input type="checkbox"/> coronary disease*<br><input type="checkbox"/> peripheral arterial disease* | <input type="checkbox"/> IDDM without complications<br><input type="checkbox"/> Poorly controlled AODM with oral agents                        | <input type="checkbox"/> AODM controlled by oral agents only                                                                                             |
| <b>Neurological System</b>     |                                                                                                                                                                                                                                                                                                                                                           |                                                                                                                                                |                                                                                                                                                          |
| Stroke                         | <input type="checkbox"/> Acute stroke with coma or significant neurologic deficit                                                                                                                                                                                                                                                                         | <input type="checkbox"/> Old stroke with neurologic residua                                                                                    | <input type="checkbox"/> Stroke with no residual<br><input type="checkbox"/> Past or recent TIA                                                          |
| Dementia                       | <input type="checkbox"/> Severe dementia requiring full support for activities of daily living                                                                                                                                                                                                                                                            | <input type="checkbox"/> Moderate dementia (not completely self-sufficient, needs supervising)                                                 | <input type="checkbox"/> Mild dementia (can take care of self)                                                                                           |
| Paralysis                      | <input type="checkbox"/> Paraplegia or hemiplegia requiring full support for activities of daily living                                                                                                                                                                                                                                                   | <input type="checkbox"/> Paraplegia or hemiplegia requiring wheelchair, but able to do some self care                                          | <input type="checkbox"/> Paraplegia or hemiplegia but ambulatory and providing most of self care                                                         |
| Neuromuscular                  | <input type="checkbox"/> MS, Parkinson's or other chronic neuromuscular disorder and requiring full support for activities of daily living                                                                                                                                                                                                                | <input type="checkbox"/> MS, Parkinson's, or other chronic neuromuscular disorder, but able to do some self care                               | <input type="checkbox"/> MS, Parkinson's, or other chronic neuromuscular disorder, but ambulatory and providing most of self care                        |
| <b>Psychiatric</b>             |                                                                                                                                                                                                                                                                                                                                                           |                                                                                                                                                |                                                                                                                                                          |
|                                | <input type="checkbox"/> Recent suicidal attempt<br><input type="checkbox"/> Active schizophrenia                                                                                                                                                                                                                                                         | <input type="checkbox"/> Depression or bipolar disorder uncontrolled<br><input type="checkbox"/> Schizophrenia controlled with medication      | <input type="checkbox"/> Depression or bipolar disorder controlled w/ medication                                                                         |
| <b>Rheumatologic</b>           | <b>(Including Rheumatoid Arthritis, Systemic Lupus, Mixed Connective Tissue Disorder, Polymyositis, Rheumatic Polymyositis)</b>                                                                                                                                                                                                                           |                                                                                                                                                |                                                                                                                                                          |
|                                | <input type="checkbox"/> Connective Tissue Disorder with secondary end-organ failure (renal, cardiac, CNS)                                                                                                                                                                                                                                                | <input type="checkbox"/> Connective Tissue Disorder on steroids or immunosuppressant medications                                               | <input type="checkbox"/> Connective Tissue Disorder on NSAIDS or no treatment                                                                            |
| <b>Immunological System</b>    |                                                                                                                                                                                                                                                                                                                                                           |                                                                                                                                                |                                                                                                                                                          |
| AIDS                           | <input type="checkbox"/> Fulminant AIDS w/KS, MAI, PCP (AIDS defining illness)                                                                                                                                                                                                                                                                            | <input type="checkbox"/> HIV+ with h/o defining illness. CD4 <sup>+</sup> < 200/μL                                                             | <input type="checkbox"/> Asymptomatic HIV+ patient.<br><input type="checkbox"/> HIV <sup>+</sup> w/o h/o AIDS defining illness. CD4 <sup>+</sup> > 200μL |
| <b>Malignancy</b>              | <b>(Excluding Cutaneous Basal Cell Ca., Cutaneous SCCA, Carcinoma in-situ, and Intraepithelial Neoplasm)</b>                                                                                                                                                                                                                                              |                                                                                                                                                |                                                                                                                                                          |
| Solid Tumor including melanoma | <input type="checkbox"/> Uncontrolled cancer<br><input type="checkbox"/> Newly diagnosed but not yet treated<br><input type="checkbox"/> Metastatic solid tumor                                                                                                                                                                                           | <input type="checkbox"/> Any controlled solid tumor without documented metastases, but initially diagnosed and treated within the last 5 years | <input type="checkbox"/> Any controlled solid tumor without documented metastases, but initially diagnosed and treated > 5 years ago                     |
| Leukemia                       | <input type="checkbox"/> Relapse                                                                                                                                                                                                                                                                                                                          | <input type="checkbox"/> 1 <sup>st</sup> remission or new dx <1yr<br><input type="checkbox"/> Chronic suppressive therapy                      | <input type="checkbox"/> H/o leukemia with last Rx > 1 yr prior                                                                                          |
| Lymphoma including Myeloma     | <input type="checkbox"/> Relapse                                                                                                                                                                                                                                                                                                                          | <input type="checkbox"/> 1 <sup>st</sup> remission or new dx <1yr<br><input type="checkbox"/> Chronic suppressive therapy                      | <input type="checkbox"/> H/o lymphoma w/ last Rx >1 yr prior                                                                                             |
| <b>Substance Abuse</b>         |                                                                                                                                                                                                                                                                                                                                                           |                                                                                                                                                |                                                                                                                                                          |
| Alcohol                        | <input type="checkbox"/> Delirium tremens                                                                                                                                                                                                                                                                                                                 | <input checked="" type="checkbox"/> Active alcohol abuse with social, behavioral, or medical complications                                     | <input type="checkbox"/> H/o alcohol abuse but not presently drinking                                                                                    |
| Illicit Drugs                  | <input type="checkbox"/> Acute Withdrawal Syndrome                                                                                                                                                                                                                                                                                                        | <input type="checkbox"/> Active substance abuse with social, behavioral, or medical complications                                              | <input type="checkbox"/> H/o substance abuse but not presently using                                                                                     |
| <b>Body Weight</b>             |                                                                                                                                                                                                                                                                                                                                                           |                                                                                                                                                |                                                                                                                                                          |
| Obesity                        |                                                                                                                                                                                                                                                                                                                                                           | <input type="checkbox"/> Morbid (i.e., BMI ≥ 38)                                                                                               |                                                                                                                                                          |

**OVERALL COMORBIDITY SCORE    2**

## **SCENARIO # 4**

**DATE:** January 14, 1998

**CHIEF COMPLAINT:** shortness of breath, weight loss

**HISTORY OF PRESENT ILLNESS:** 67-year old male presented to private medical doctor with 4 month history of dyspnea on exertion, 2 pillow orthopnea, 15 lb. weight loss, and no hemoptysis or cough. Denies myocardial infarction, diabetes mellitus, heart disease, peptic ulcer disease, tuberculosis, or peripheral vascular disease.

### **PAST MEDICAL HISTORY:**

Surgical History: Hernia repair in 1983.

Complete excision of malignant melanoma in October 1993.

Medical History: hypertension, atrial fibrillation, cerebrovascular accident 1991

Medications: VasoTec, Coumadin

Allergies: no known allergies

**SOCIAL HISTORY:** Married, retired, former factory worker. Smoker of 1 pack per day for 45 years. Quit in 1991. Socially drinks. Denies intravenous drug abuse.

**FAMILY HISTORY:** Mother died at the age of 72 from breast cancer. Father died at the age of 69 with cerebrovascular accident. Brother has prostate cancer.

**PHYSICAL EXAM :** 67 year old male with shortness of breath

Extraocular movement: full

Head, eyes, ears, nose, and throat: neg

Lungs: decreased breath sounds R upper lobe

Abdomen: neg

Heart: normal sinus rhythm, no murmurs

Neuro: neg

Extremities: Intact

**LABS:** Chest CT and Chest x-ray, 3.2 x 2.7 x 2.3 cm mass right upper lobe mass consistent with bronchiogenic carcinoma, several enlarged peripheral lymph nodes (largest 2.3 cm), no mediastinal adenopathy

**PATH:** Fine needle aspiration of right upper lobe - poorly differentiated non-small cell carcinoma

**PRIMARY DIAGNOSIS:** Stage IIIA primary bronchiogenic carcinoma with **perihilar lymphadenopathy**

Date \_\_\_\_\_

Coder's Initials \_\_\_\_\_

Oncology Center \_\_\_\_\_

Accession # Scenario #4

**Adult Comorbidity Evaluation-27**

Identify the important medical comorbidities and grade severity using the index.  
Overall Comorbidity Score is defined according to the highest ranked single ailment,  
except in the case where two or more Grade 2 ailments occur in different organ systems.  
In this situation, the overall comorbidity score should be designated Grade 3.

| <b>Cogent comorbid ailment</b>   | <b>Grade 3<br/>Severe Decompensation</b>                                                                                                                                                                                                                                                                                                                                                                               | <b>Grade 2<br/>Moderate Decompensation</b>                                                                                                                                                                                     | <b>Grade 1<br/>Mild Decompensation</b>                                                                                                                                                                                                                                                                  |
|----------------------------------|------------------------------------------------------------------------------------------------------------------------------------------------------------------------------------------------------------------------------------------------------------------------------------------------------------------------------------------------------------------------------------------------------------------------|--------------------------------------------------------------------------------------------------------------------------------------------------------------------------------------------------------------------------------|---------------------------------------------------------------------------------------------------------------------------------------------------------------------------------------------------------------------------------------------------------------------------------------------------------|
| <b>Cardiovascular System</b>     |                                                                                                                                                                                                                                                                                                                                                                                                                        |                                                                                                                                                                                                                                |                                                                                                                                                                                                                                                                                                         |
| Myocardial Infarct               | <input type="checkbox"/> MI ≤ 6 months                                                                                                                                                                                                                                                                                                                                                                                 | <input type="checkbox"/> MI > 6 months ago                                                                                                                                                                                     | <input type="checkbox"/> MI by ECG only, age undetermined                                                                                                                                                                                                                                               |
| Angina / Coronary Artery Disease | <input type="checkbox"/> Unstable angina                                                                                                                                                                                                                                                                                                                                                                               | <input type="checkbox"/> Chronic exertional angina<br><input type="checkbox"/> Recent (≤ 6 months) CABG or PTCA<br><input type="checkbox"/> Recent (≤ 6 months) coronary stent                                                 | <input type="checkbox"/> ECG or stress test evidence or catheterization evidence of coronary disease without symptoms<br><input type="checkbox"/> Angina pectoris not requiring hospitalization<br><input type="checkbox"/> CABG or PTCA (>6 mos.)<br><input type="checkbox"/> Coronary stent (>6 mos.) |
| Congestive Heart Failure         | <input type="checkbox"/> Hospitalized for CHF within past 6 months<br><input type="checkbox"/> Ejection fraction < 20%                                                                                                                                                                                                                                                                                                 | <input type="checkbox"/> Hospitalized for CHF >6 months prior<br><input type="checkbox"/> CHF with dyspnea which limits activities                                                                                             | <input type="checkbox"/> CHF with dyspnea which has responded to treatment<br><input type="checkbox"/> Exertional dyspnea<br><input type="checkbox"/> PND                                                                                                                                               |
| Arrhythmias                      | <input type="checkbox"/> Ventricular arrhythmia ≤ 6 months                                                                                                                                                                                                                                                                                                                                                             | <input type="checkbox"/> Ventricular arrhythmia > 6 months ago<br><input checked="" type="checkbox"/> Chronic atrial fibrillation or flutter<br><input type="checkbox"/> Pacemaker                                             | <input type="checkbox"/> Sick Sinus Syndrome                                                                                                                                                                                                                                                            |
| Hypertension                     | <input type="checkbox"/> DBP ≥ 130 mm Hg<br><input type="checkbox"/> Severe malignant papilledema or other eye changes<br><input type="checkbox"/> Encephalopathy                                                                                                                                                                                                                                                      | <input type="checkbox"/> DBP 115-129 mm Hg<br><input type="checkbox"/> DBP 90-114 mm Hg while taking antihypertensive medications<br><input type="checkbox"/> Secondary cardiovascular symptoms: vertigo, epistaxis, headaches | <input type="checkbox"/> DBP 90-114 mm Hg while <u>not</u> taking antihypertensive medications<br><input checked="" type="checkbox"/> DBP < 90 mm Hg while taking antihypertensive medications<br><input type="checkbox"/> Hypertension NOS                                                             |
| Venous Disease                   | <input type="checkbox"/> Recent PE (≤ 6 mos.)<br><input type="checkbox"/> Use of venous filter for PE's                                                                                                                                                                                                                                                                                                                | <input type="checkbox"/> DVT controlled with Coumadin or heparin<br><input type="checkbox"/> Old PE > 6mos                                                                                                                     | <input type="checkbox"/> Old DVT no longer treated with Coumadin or Heparin                                                                                                                                                                                                                             |
| Peripheral Arterial Disease      | <input type="checkbox"/> Bypass or amputation for gangrene or arterial insufficiency < 6 months ago<br><input type="checkbox"/> Untreated thoracic or abdominal aneurysm (≥ 6 cm)                                                                                                                                                                                                                                      | <input type="checkbox"/> Bypass or amputation for gangrene or arterial insufficiency > 6 months ago<br><input type="checkbox"/> Chronic insufficiency                                                                          | <input type="checkbox"/> Intermittent claudication<br><input type="checkbox"/> Untreated thoracic or abdominal aneurysm (< 6 cm)<br><input type="checkbox"/> s/p abdominal or thoracic aortic aneurysm repair                                                                                           |
| <b>Respiratory System</b>        |                                                                                                                                                                                                                                                                                                                                                                                                                        |                                                                                                                                                                                                                                |                                                                                                                                                                                                                                                                                                         |
|                                  | <input type="checkbox"/> Marked pulmonary insufficiency<br><input type="checkbox"/> Restrictive Lung Disease or COPD with dyspnea at rest despite treatment<br><input type="checkbox"/> Chronic supplemental O <sub>2</sub><br><input type="checkbox"/> CO <sub>2</sub> retention (pCO <sub>2</sub> > 50 torr)<br><input type="checkbox"/> Baseline pO <sub>2</sub> < 50 torr<br><input type="checkbox"/> FEV1 (< 50%) | <input type="checkbox"/> Restrictive Lung Disease or COPD (chronic bronchitis, emphysema, or asthma) with dyspnea which limits activities<br><input type="checkbox"/> FEV1 (51%-65%)                                           | <input type="checkbox"/> Restrictive Lung Disease or COPD (chronic bronchitis, emphysema, or asthma) with dyspnea which has responded to treatment<br><input type="checkbox"/> FEV1 (66%-80%)                                                                                                           |
| <b>Gastrointestinal System</b>   |                                                                                                                                                                                                                                                                                                                                                                                                                        |                                                                                                                                                                                                                                |                                                                                                                                                                                                                                                                                                         |
| Hepatic                          | <input type="checkbox"/> Portal hypertension and/or esophageal bleeding ≤ 6 mos. (Encephalopathy, Ascites, Jaundice with Total Bilirubin > 2)                                                                                                                                                                                                                                                                          | <input type="checkbox"/> Chronic hepatitis, cirrhosis, portal hypertension with moderate symptoms "compensated hepatic failure"                                                                                                | <input type="checkbox"/> Chronic hepatitis or cirrhosis without portal hypertension<br><input type="checkbox"/> Chronic liver disease manifested on biopsy or persistently elevated bilirubin (>3 mg/dl)                                                                                                |
| Stomach / Intestine              | <input type="checkbox"/> Recent ulcers (≤ 6 months ago) requiring blood transfusion                                                                                                                                                                                                                                                                                                                                    | <input type="checkbox"/> Ulcers requiring surgery or transfusion > 6 months ago                                                                                                                                                | <input type="checkbox"/> Diagnosis of ulcers treated with meds<br><input type="checkbox"/> Chronic malabsorption syndrome<br><input type="checkbox"/> Inflammatory bowel disease (IBD) on meds or h/o with complications and/or surgery                                                                 |
| Pancreas                         | <input type="checkbox"/> Acute or chronic pancreatitis with major complications (phlegmon, abscess, or pseudocyst)                                                                                                                                                                                                                                                                                                     | <input type="checkbox"/> Uncomplicated acute pancreatitis<br><input type="checkbox"/> Chronic pancreatitis with minor complications (malabsorption, impaired glucose tolerance, or GI bleeding)                                | <input type="checkbox"/> Chronic pancreatitis w/o complications                                                                                                                                                                                                                                         |

| <b>Cogent comorbid ailment</b>                                                                                                                | <b>Grade 3<br/>Severe Decompensation</b>                                                                                                                                                                                                                                                                                                                  | <b>Grade 2<br/>Moderate Decompensation</b>                                                                                                                                                                        | <b>Grade 1<br/>Mild Decompensation</b>                                                                                                                   |
|-----------------------------------------------------------------------------------------------------------------------------------------------|-----------------------------------------------------------------------------------------------------------------------------------------------------------------------------------------------------------------------------------------------------------------------------------------------------------------------------------------------------------|-------------------------------------------------------------------------------------------------------------------------------------------------------------------------------------------------------------------|----------------------------------------------------------------------------------------------------------------------------------------------------------|
| <b>Renal System</b>                                                                                                                           |                                                                                                                                                                                                                                                                                                                                                           |                                                                                                                                                                                                                   |                                                                                                                                                          |
| End-stage renal disease                                                                                                                       | <input type="checkbox"/> Creatinine > 3 mg% with multi-organ failure, shock, or sepsis<br><input type="checkbox"/> Acute dialysis                                                                                                                                                                                                                         | <input type="checkbox"/> Chronic Renal Insufficiency with creatinine >3 mg%<br><input type="checkbox"/> Chronic dialysis                                                                                          | <input type="checkbox"/> Chronic Renal Insufficiency with creatinine 2-3 mg%.                                                                            |
| <b>Endocrine System</b>                                                                                                                       | <b>(Code the comorbid ailments with the (*) in both the Endocrine system and other organ systems if applicable)</b>                                                                                                                                                                                                                                       |                                                                                                                                                                                                                   |                                                                                                                                                          |
| Diabetes Mellitus                                                                                                                             | <input type="checkbox"/> Hospitalization ≤ 6 months for DKA<br><input type="checkbox"/> Diabetes causing end-organ failure<br><input type="checkbox"/> retinopathy<br><input type="checkbox"/> neuropathy<br><input type="checkbox"/> nephropathy*<br><input type="checkbox"/> coronary disease*<br><input type="checkbox"/> peripheral arterial disease* | <input type="checkbox"/> IDDM without complications<br><input type="checkbox"/> Poorly controlled AODM with oral agents                                                                                           | <input type="checkbox"/> AODM controlled by oral agents only                                                                                             |
| <b>Neurological System</b>                                                                                                                    |                                                                                                                                                                                                                                                                                                                                                           |                                                                                                                                                                                                                   |                                                                                                                                                          |
| Stroke                                                                                                                                        | <input type="checkbox"/> Acute stroke with coma or significant neurologic deficit                                                                                                                                                                                                                                                                         | <input type="checkbox"/> Old stroke with neurologic residua                                                                                                                                                       | <input checked="" type="checkbox"/> Stroke with no residual<br><input type="checkbox"/> Past or recent TIA                                               |
| Dementia                                                                                                                                      | <input type="checkbox"/> Severe dementia requiring full support for activities of daily living                                                                                                                                                                                                                                                            | <input type="checkbox"/> Moderate dementia (not completely self-sufficient, needs supervising)                                                                                                                    | <input type="checkbox"/> Mild dementia (can take care of self)                                                                                           |
| Paralysis                                                                                                                                     | <input type="checkbox"/> Paraplegia or hemiplegia requiring full support for activities of daily living                                                                                                                                                                                                                                                   | <input type="checkbox"/> Paraplegia or hemiplegia requiring wheelchair, but able to do some self care                                                                                                             | <input type="checkbox"/> Paraplegia or hemiplegia but ambulatory and providing most of self care                                                         |
| Neuromuscular                                                                                                                                 | <input type="checkbox"/> MS, Parkinson's or other chronic neuromuscular disorder and requiring full support for activities of daily living                                                                                                                                                                                                                | <input type="checkbox"/> MS, Parkinson's, or other chronic neuromuscular disorder, but able to do some self care                                                                                                  | <input type="checkbox"/> MS, Parkinson's, or other chronic neuromuscular disorder, but ambulatory and providing most of self care                        |
| <b>Psychiatric</b>                                                                                                                            |                                                                                                                                                                                                                                                                                                                                                           |                                                                                                                                                                                                                   |                                                                                                                                                          |
|                                                                                                                                               | <input type="checkbox"/> Recent suicidal attempt<br><input type="checkbox"/> Active schizophrenia                                                                                                                                                                                                                                                         | <input type="checkbox"/> Depression or bipolar disorder uncontrolled<br><input type="checkbox"/> Schizophrenia controlled with medication                                                                         | <input type="checkbox"/> Depression or bipolar disorder controlled w/ medication                                                                         |
| <b>Rheumatologic (Including Rheumatoid Arthritis, Systemic Lupus, Mixed Connective Tissue Disorder, Polymyositis, Rheumatic Polymyositis)</b> |                                                                                                                                                                                                                                                                                                                                                           |                                                                                                                                                                                                                   |                                                                                                                                                          |
|                                                                                                                                               | <input type="checkbox"/> Connective Tissue Disorder with secondary end-organ failure (renal, cardiac, CNS)                                                                                                                                                                                                                                                | <input type="checkbox"/> Connective Tissue Disorder on steroids or immunosuppressant medications                                                                                                                  | <input type="checkbox"/> Connective Tissue Disorder on NSAIDS or no treatment                                                                            |
| <b>Immunological System</b>                                                                                                                   |                                                                                                                                                                                                                                                                                                                                                           |                                                                                                                                                                                                                   |                                                                                                                                                          |
| AIDS                                                                                                                                          | <input type="checkbox"/> Fulminant AIDS w/KS, MAI, PCP (AIDS defining illness)                                                                                                                                                                                                                                                                            | <input type="checkbox"/> HIV+ with h/o defining illness. CD4 <sup>+</sup> < 200/μL                                                                                                                                | <input type="checkbox"/> Asymptomatic HIV+ patient.<br><input type="checkbox"/> HIV <sup>+</sup> w/o h/o AIDS defining illness. CD4 <sup>+</sup> > 200μL |
| <b>Malignancy (Excluding Cutaneous Basal Cell Ca., Cutaneous SCCA, Carcinoma in-situ, and Intraepithelial Neoplasm)</b>                       |                                                                                                                                                                                                                                                                                                                                                           |                                                                                                                                                                                                                   |                                                                                                                                                          |
| Solid Tumor including melanoma                                                                                                                | <input type="checkbox"/> Uncontrolled cancer<br><input type="checkbox"/> Newly diagnosed but not yet treated<br><input type="checkbox"/> Metastatic solid tumor                                                                                                                                                                                           | <input checked="" type="checkbox"/> Any controlled solid tumor without documented metastases, but initially diagnosed and treated within the last 5 years<br><input type="checkbox"/> Chronic suppressive therapy | <input type="checkbox"/> Any controlled solid tumor without documented metastases, but initially diagnosed and treated > 5 years ago                     |
| Leukemia                                                                                                                                      | <input type="checkbox"/> Relapse                                                                                                                                                                                                                                                                                                                          | <input type="checkbox"/> 1 <sup>st</sup> remission or new dx <1yr<br><input type="checkbox"/> Chronic suppressive therapy                                                                                         | <input type="checkbox"/> H/o leukemia with last Rx > 1 yr prior                                                                                          |
| Lymphoma including Myeloma                                                                                                                    | <input type="checkbox"/> Relapse                                                                                                                                                                                                                                                                                                                          | <input type="checkbox"/> 1 <sup>st</sup> remission or new dx <1yr<br><input type="checkbox"/> Chronic suppressive therapy                                                                                         | <input type="checkbox"/> H/o lymphoma w/ last Rx >1 yr prior                                                                                             |
| <b>Substance Abuse</b>                                                                                                                        |                                                                                                                                                                                                                                                                                                                                                           |                                                                                                                                                                                                                   |                                                                                                                                                          |
| Alcohol                                                                                                                                       | <input type="checkbox"/> Delirium tremens                                                                                                                                                                                                                                                                                                                 | <input type="checkbox"/> Active alcohol abuse with social, behavioral, or medical complications                                                                                                                   | <input type="checkbox"/> H/o alcohol abuse but not presently drinking                                                                                    |
| Illicit Drugs                                                                                                                                 | <input type="checkbox"/> Acute Withdrawal Syndrome                                                                                                                                                                                                                                                                                                        | <input type="checkbox"/> Active substance abuse with social, behavioral, or medical complications                                                                                                                 | <input type="checkbox"/> H/o substance abuse but not presently using                                                                                     |
| <b>Body Weight</b>                                                                                                                            |                                                                                                                                                                                                                                                                                                                                                           |                                                                                                                                                                                                                   |                                                                                                                                                          |
| Obesity                                                                                                                                       |                                                                                                                                                                                                                                                                                                                                                           | <input type="checkbox"/> Morbid (i.e., BMI ≥38)                                                                                                                                                                   |                                                                                                                                                          |

## OVERALL COMORBIDITY SCORE 3

## **SCENARIO # 5**

**DATE:** July 15, 1998

**CHIEF COMPLAINT:** Routine follow-up yearly mammogram

**HISTORY OF PRESENT ILLNESS:** 48 year old female presented for yearly mammogram. Patient was informed of findings of 2.0 cm spiculated mass in left upper outer quadrant. Patient saw surgeon who performed needle biopsy. Results showed ductal carcinoma with small couredo in-situ component. Patient present for Modified Radical Mastectomy.

### **PAST MEDICAL HISTORY:**

Surgical History: Tonsillectomy and Adenoidectomy as child

Medical History: Depression

Medications: Elivil

Allergies: No known allergies

**SOCIAL HISTORY:** Patient is Gravida 4 Para 3. Patient is married and is a vice president for a large marketing corporation. She denies smoking history, social drinker, no history intravenous drug abuse.

**FAMILY HISTORY:** Maternal Grandmother with breast cancer, sister breast cancer, brother with hypertension and myocardial infarction. Father died age 74 of myocardial infarction. Mother died age 72 with cerebrovascular accident.

**PHYSICAL EXAM :** 48 year old female

Extraocular movement: full

Head, eyes, ears, nose, and throat: neg

Lungs: clear

Heart : normal sinus rhythm

Breast: No palpable abnormalities

Abdomen: neg

Neuro: neg

Extremities: intact

**LABS:** Chest x-ray: no evidence of disease, Mammogram: As above, Estrogen Receptor / Progesterone Receptor: pos by immunohistochemical stains

**PRIMARY DIAGNOSIS:** Stage I left upper outer quadrant ductal adenocarcinoma, **no palpable lymphadenopathy**

Date \_\_\_\_\_

Coder's Initials \_\_\_\_\_

Oncology Center \_\_\_\_\_

Accession # \_Scenario #5\_

**Adult Comorbidity Evaluation-27**

Identify the important medical comorbidities and grade severity using the index.

Overall Comorbidity Score is defined according to the highest ranked single ailment, except in the case where two or more Grade 2 ailments occur in different organ systems.

In this situation, the overall comorbidity score should be designated Grade 3.

| Cogent comorbid ailment          | Grade 3<br>Severe Decompensation                                                                                                                                                                                                                                                                                                                                                                                       | Grade 2<br>Moderate Decompensation                                                                                                                                                                                             | Grade 1<br>Mild Decompensation                                                                                                                                                                                                                                                                          |
|----------------------------------|------------------------------------------------------------------------------------------------------------------------------------------------------------------------------------------------------------------------------------------------------------------------------------------------------------------------------------------------------------------------------------------------------------------------|--------------------------------------------------------------------------------------------------------------------------------------------------------------------------------------------------------------------------------|---------------------------------------------------------------------------------------------------------------------------------------------------------------------------------------------------------------------------------------------------------------------------------------------------------|
| <b>Cardiovascular System</b>     |                                                                                                                                                                                                                                                                                                                                                                                                                        |                                                                                                                                                                                                                                |                                                                                                                                                                                                                                                                                                         |
| Myocardial Infarct               | <input type="checkbox"/> MI ≤ 6 months                                                                                                                                                                                                                                                                                                                                                                                 | <input type="checkbox"/> MI > 6 months ago                                                                                                                                                                                     | <input type="checkbox"/> MI by ECG only, age undetermined                                                                                                                                                                                                                                               |
| Angina / Coronary Artery Disease | <input type="checkbox"/> Unstable angina                                                                                                                                                                                                                                                                                                                                                                               | <input type="checkbox"/> Chronic exertional angina<br><input type="checkbox"/> Recent (≤ 6 months) CABG or PTCA<br><input type="checkbox"/> Recent (≤ 6 months) coronary stent                                                 | <input type="checkbox"/> ECG or stress test evidence or catheterization evidence of coronary disease without symptoms<br><input type="checkbox"/> Angina pectoris not requiring hospitalization<br><input type="checkbox"/> CABG or PTCA (>6 mos.)<br><input type="checkbox"/> Coronary stent (>6 mos.) |
| Congestive Heart Failure         | <input type="checkbox"/> Hospitalized for CHF within past 6 months<br><input type="checkbox"/> Ejection fraction < 20%                                                                                                                                                                                                                                                                                                 | <input type="checkbox"/> Hospitalized for CHF >6 months prior<br><input type="checkbox"/> CHF with dyspnea which limits activities                                                                                             | <input type="checkbox"/> CHF with dyspnea which has responded to treatment<br><input type="checkbox"/> Exertional dyspnea<br><input type="checkbox"/> PND                                                                                                                                               |
| Arrhythmias                      | <input type="checkbox"/> Ventricular arrhythmia ≤ 6 months                                                                                                                                                                                                                                                                                                                                                             | <input type="checkbox"/> Ventricular arrhythmia > 6 months ago<br><input type="checkbox"/> Chronic atrial fibrillation or flutter<br><input type="checkbox"/> Pacemaker                                                        | <input type="checkbox"/> Sick Sinus Syndrome                                                                                                                                                                                                                                                            |
| Hypertension                     | <input type="checkbox"/> DBP ≥ 130 mm Hg<br><input type="checkbox"/> Severe malignant papilledema or other eye changes<br><input type="checkbox"/> Encephalopathy                                                                                                                                                                                                                                                      | <input type="checkbox"/> DBP 115-129 mm Hg<br><input type="checkbox"/> DBP 90-114 mm Hg while taking antihypertensive medications<br><input type="checkbox"/> Secondary cardiovascular symptoms: vertigo, epistaxis, headaches | <input type="checkbox"/> DBP 90-114 mm Hg while <u>not</u> taking antihypertensive medications<br><input type="checkbox"/> DBP < 90 mm Hg while taking antihypertensive medications<br><input type="checkbox"/> Hypertension NOS                                                                        |
| Venous Disease                   | <input type="checkbox"/> Recent PE (≤ 6 mos.)<br><input type="checkbox"/> Use of venous filter for PE's                                                                                                                                                                                                                                                                                                                | <input type="checkbox"/> DVT controlled with Coumadin or heparin<br><input type="checkbox"/> Old PE > 6mos                                                                                                                     | <input type="checkbox"/> Old DVT no longer treated with Coumadin or Heparin                                                                                                                                                                                                                             |
| Peripheral Arterial Disease      | <input type="checkbox"/> Bypass or amputation for gangrene or arterial insufficiency < 6 months ago<br><input type="checkbox"/> Untreated thoracic or abdominal aneurysm (≥ 6 cm)                                                                                                                                                                                                                                      | <input type="checkbox"/> Bypass or amputation for gangrene or arterial insufficiency > 6 months ago<br><input type="checkbox"/> Chronic insufficiency                                                                          | <input type="checkbox"/> Intermittent claudication<br><input type="checkbox"/> Untreated thoracic or abdominal aneurysm (< 6 cm)<br><input type="checkbox"/> s/p abdominal or thoracic aortic aneurysm repair                                                                                           |
| <b>Respiratory System</b>        |                                                                                                                                                                                                                                                                                                                                                                                                                        |                                                                                                                                                                                                                                |                                                                                                                                                                                                                                                                                                         |
|                                  | <input type="checkbox"/> Marked pulmonary insufficiency<br><input type="checkbox"/> Restrictive Lung Disease or COPD with dyspnea at rest despite treatment<br><input type="checkbox"/> Chronic supplemental O <sub>2</sub><br><input type="checkbox"/> CO <sub>2</sub> retention (pCO <sub>2</sub> > 50 torr)<br><input type="checkbox"/> Baseline pO <sub>2</sub> < 50 torr<br><input type="checkbox"/> FEV1 (< 50%) | <input type="checkbox"/> Restrictive Lung Disease or COPD (chronic bronchitis, emphysema, or asthma) with dyspnea which limits activities<br><input type="checkbox"/> FEV1 (51%-65%)                                           | <input type="checkbox"/> Restrictive Lung Disease or COPD (chronic bronchitis, emphysema, or asthma) with dyspnea which has responded to treatment<br><input type="checkbox"/> FEV1 (66%-80%)                                                                                                           |
| <b>Gastrointestinal System</b>   |                                                                                                                                                                                                                                                                                                                                                                                                                        |                                                                                                                                                                                                                                |                                                                                                                                                                                                                                                                                                         |
| Hepatic                          | <input type="checkbox"/> Portal hypertension and/or esophageal bleeding ≤ 6 mos. (Encephalopathy, Ascites, Jaundice with Total Bilirubin > 2)                                                                                                                                                                                                                                                                          | <input type="checkbox"/> Chronic hepatitis, cirrhosis, portal hypertension with moderate symptoms "compensated hepatic failure"                                                                                                | <input type="checkbox"/> Chronic hepatitis or cirrhosis without portal hypertension<br><input type="checkbox"/> Chronic liver disease manifested on biopsy or persistently elevated bilirubin (>3 mg/dl)                                                                                                |
| Stomach / Intestine              | <input type="checkbox"/> Recent ulcers (≤ 6 months ago) requiring blood transfusion                                                                                                                                                                                                                                                                                                                                    | <input type="checkbox"/> Ulcers requiring surgery or transfusion > 6 months ago                                                                                                                                                | <input type="checkbox"/> Diagnosis of ulcers treated with meds<br><input type="checkbox"/> Chronic malabsorption syndrome<br><input type="checkbox"/> Inflammatory bowel disease (IBD) on meds or h/o with complications and/or surgery                                                                 |
| Pancreas                         | <input type="checkbox"/> Acute or chronic pancreatitis with major complications (phlegmon, abscess, or pseudocyst)                                                                                                                                                                                                                                                                                                     | <input type="checkbox"/> Uncomplicated acute pancreatitis<br><input type="checkbox"/> Chronic pancreatitis with minor complications (malabsorption, impaired glucose tolerance, or GI bleeding)                                | <input type="checkbox"/> Chronic pancreatitis w/o complications                                                                                                                                                                                                                                         |

**Cogent comorbid****Grade 3****Grade 2****Grade 1**

| ailment                        | Severe Decompensation                                                                                                                                                                                                                                                                                                                                     | Moderate Decompensation                                                                                                                        | Mild Decompensation                                                                                                                                      |
|--------------------------------|-----------------------------------------------------------------------------------------------------------------------------------------------------------------------------------------------------------------------------------------------------------------------------------------------------------------------------------------------------------|------------------------------------------------------------------------------------------------------------------------------------------------|----------------------------------------------------------------------------------------------------------------------------------------------------------|
| <b>Renal System</b>            |                                                                                                                                                                                                                                                                                                                                                           |                                                                                                                                                |                                                                                                                                                          |
| End-stage renal disease        | <input type="checkbox"/> Creatinine > 3 mg% with multi-organ failure, shock, or sepsis<br><input type="checkbox"/> Acute dialysis                                                                                                                                                                                                                         | <input type="checkbox"/> Chronic Renal Insufficiency with creatinine >3 mg%<br><input type="checkbox"/> Chronic dialysis                       | <input type="checkbox"/> Chronic Renal Insufficiency with creatinine 2-3 mg%.                                                                            |
| <b>Endocrine System</b>        | <b>(Code the comorbid ailments with the (*) in both the Endocrine system and other organ systems if applicable)</b>                                                                                                                                                                                                                                       |                                                                                                                                                |                                                                                                                                                          |
| Diabetes Mellitus              | <input type="checkbox"/> Hospitalization ≤ 6 months for DKA<br><input type="checkbox"/> Diabetes causing end-organ failure<br><input type="checkbox"/> retinopathy<br><input type="checkbox"/> neuropathy<br><input type="checkbox"/> nephropathy*<br><input type="checkbox"/> coronary disease*<br><input type="checkbox"/> peripheral arterial disease* | <input type="checkbox"/> IDDM without complications<br><input type="checkbox"/> Poorly controlled AODM with oral agents                        | <input type="checkbox"/> AODM controlled by oral agents only                                                                                             |
| <b>Neurological System</b>     |                                                                                                                                                                                                                                                                                                                                                           |                                                                                                                                                |                                                                                                                                                          |
| Stroke                         | <input type="checkbox"/> Acute stroke with coma or significant neurologic deficit                                                                                                                                                                                                                                                                         | <input type="checkbox"/> Old stroke with neurologic residua                                                                                    | <input type="checkbox"/> Stroke with no residual<br><input type="checkbox"/> Past or recent TIA                                                          |
| Dementia                       | <input type="checkbox"/> Severe dementia requiring full support for activities of daily living                                                                                                                                                                                                                                                            | <input type="checkbox"/> Moderate dementia (not completely self-sufficient, needs supervising)                                                 | <input type="checkbox"/> Mild dementia (can take care of self)                                                                                           |
| Paralysis                      | <input type="checkbox"/> Paraplegia or hemiplegia requiring full support for activities of daily living                                                                                                                                                                                                                                                   | <input type="checkbox"/> Paraplegia or hemiplegia requiring wheelchair, but able to do some self care                                          | <input type="checkbox"/> Paraplegia or hemiplegia but ambulatory and providing most of self care                                                         |
| Neuromuscular                  | <input type="checkbox"/> MS, Parkinson's or other chronic neuromuscular disorder and requiring full support for activities of daily living                                                                                                                                                                                                                | <input type="checkbox"/> MS, Parkinson's, or other chronic neuromuscular disorder, but able to do some self care                               | <input type="checkbox"/> MS, Parkinson's, or other chronic neuromuscular disorder, but ambulatory and providing most of self care                        |
| <b>Psychiatric</b>             |                                                                                                                                                                                                                                                                                                                                                           |                                                                                                                                                |                                                                                                                                                          |
|                                | <input type="checkbox"/> Recent suicidal attempt<br><input type="checkbox"/> Active schizophrenia                                                                                                                                                                                                                                                         | <input type="checkbox"/> Depression or bipolar disorder uncontrolled<br><input type="checkbox"/> Schizophrenia controlled with medication      | <input checked="" type="checkbox"/> Depression or bipolar disorder controlled w/ medication                                                              |
| <b>Rheumatologic</b>           | <b>(Including Rheumatoid Arthritis, Systemic Lupus, Mixed Connective Tissue Disorder, Polymyositis, Rheumatic Polymyositis)</b>                                                                                                                                                                                                                           |                                                                                                                                                |                                                                                                                                                          |
|                                | <input type="checkbox"/> Connective Tissue Disorder with secondary end-organ failure (renal, cardiac, CNS)                                                                                                                                                                                                                                                | <input type="checkbox"/> Connective Tissue Disorder on steroids or immunosuppressant medications                                               | <input type="checkbox"/> Connective Tissue Disorder on NSAIDs or no treatment                                                                            |
| <b>Immunological System</b>    |                                                                                                                                                                                                                                                                                                                                                           |                                                                                                                                                |                                                                                                                                                          |
| AIDS                           | <input type="checkbox"/> Fulminant AIDS w/KS, MAI, PCP (AIDS defining illness)                                                                                                                                                                                                                                                                            | <input type="checkbox"/> HIV+ with h/o defining illness. CD4 <sup>+</sup> < 200/μL                                                             | <input type="checkbox"/> Asymptomatic HIV+ patient.<br><input type="checkbox"/> HIV <sup>+</sup> w/o h/o AIDS defining illness. CD4 <sup>+</sup> > 200μL |
| <b>Malignancy</b>              | <b>(Excluding Cutaneous Basal Cell Ca., Cutaneous SCCA, Carcinoma in-situ, and Intraepithelial Neoplasm)</b>                                                                                                                                                                                                                                              |                                                                                                                                                |                                                                                                                                                          |
| Solid Tumor including melanoma | <input type="checkbox"/> Uncontrolled cancer<br><input type="checkbox"/> Newly diagnosed but not yet treated<br><input type="checkbox"/> Metastatic solid tumor                                                                                                                                                                                           | <input type="checkbox"/> Any controlled solid tumor without documented metastases, but initially diagnosed and treated within the last 5 years | <input type="checkbox"/> Any controlled solid tumor without documented metastases, but initially diagnosed and treated > 5 years ago                     |
| Leukemia                       | <input type="checkbox"/> Relapse                                                                                                                                                                                                                                                                                                                          | <input type="checkbox"/> 1 <sup>st</sup> remission or new dx <1yr<br><input type="checkbox"/> Chronic suppressive therapy                      | <input type="checkbox"/> H/o leukemia with last Rx > 1 yr prior                                                                                          |
| Lymphoma including Myeloma     | <input type="checkbox"/> Relapse                                                                                                                                                                                                                                                                                                                          | <input type="checkbox"/> 1 <sup>st</sup> remission or new dx <1yr<br><input type="checkbox"/> Chronic suppressive therapy                      | <input type="checkbox"/> H/o lymphoma w/ last Rx >1 yr prior                                                                                             |
| <b>Substance Abuse</b>         |                                                                                                                                                                                                                                                                                                                                                           |                                                                                                                                                |                                                                                                                                                          |
| Alcohol                        | <input type="checkbox"/> Delirium tremens                                                                                                                                                                                                                                                                                                                 | <input type="checkbox"/> Active alcohol abuse with social, behavioral, or medical complications                                                | <input type="checkbox"/> H/o alcohol abuse but not presently drinking                                                                                    |
| Illicit Drugs                  | <input type="checkbox"/> Acute Withdrawal Syndrome                                                                                                                                                                                                                                                                                                        | <input type="checkbox"/> Active substance abuse with social, behavioral, or medical complications                                              | <input type="checkbox"/> H/o substance abuse but not presently using                                                                                     |
| <b>Body Weight</b>             |                                                                                                                                                                                                                                                                                                                                                           |                                                                                                                                                |                                                                                                                                                          |
| Obesity                        |                                                                                                                                                                                                                                                                                                                                                           | <input type="checkbox"/> Morbid (i.e., BMI ≥ 38)                                                                                               |                                                                                                                                                          |

**OVERALL COMORBIDITY SCORE     1**



# **INDEX OF ABBREVIATIONS OF PROCEDURES AND DISEASES**

## **COMMON ABBREVIATIONS FOR DISEASES**

| <b>Abbreviation</b> | <b>Disease</b>                         | <b>System</b>                |
|---------------------|----------------------------------------|------------------------------|
| AIDS                | Acquired Immune deficiency syndrome    | Immune                       |
| ALL                 | Acute Lymphocytic Leukemia             | Hematologic                  |
| AML                 | Acute Myelogenous Leukemia             | Hematologic                  |
| ARDS                | Acute Respiratory Distress syndrome    | Respiratory                  |
| ATN                 | Acute Tubular Necrosis                 | Renal                        |
| ARF                 | Acute renal failure                    | Renal                        |
| AODM                | Adult onset Diabetes Mellitus          | Endocrine                    |
| ALS                 | Amyotrophic Lateral Sclerosis          | Neurologic                   |
| A.S.                | Aortic stenosis                        | Cardiovascular               |
| ASHD                | Arteriosclerotic heart disease         | Cardiovascular               |
| AS                  | Artherosclerosis                       | Cardiovascular               |
| AI                  | Atrial insufficiency                   | Cardiovascular               |
| APC                 | Atrial premature complexes             | Cardiovascular               |
| CVD                 | Cardiovascular disease                 | Cardiovascular               |
| CVA                 | Cerebrovascular accident               | Neurology                    |
| CLL                 | Chronic Lymphocytic Leukemia           | Hematologic                  |
| CML                 | Chronic Myelogenous Leukemia           | Hematologic                  |
| COLD                | Chronic obstructive lung disease       | Respiratory                  |
| COPD                | Chronic obstructive lung disease       | Respiratory                  |
| CRF                 | Chronic renal failure                  | Renal                        |
| CUC                 | chronic ulcerative colitis             | Gastrointestinal             |
| CHF                 | Congestive heart failure               | Cardiovascular               |
| CAD                 | Coronary artery disease                | Cardiovascular               |
| CF                  | Cystic Fibrosis                        | Gastrointestinal-Respiratory |
| DVT                 | Deep vein thrombosis                   | Cardiovascular               |
| DJD                 | Degenerative joint disease             | Musculoskeletal              |
| DM                  | Dermatomyositis                        | Rheumatologic                |
| DKA                 | Diabetic ketoacidosis                  | Endocrine                    |
| DIC                 | Disseminated intravascular coagulop    | Hematologic                  |
| ESRD                | End stage renal disease                | Renal                        |
| GER                 | Gastroesophageal reflux                | Gastrointestinal             |
| HAV                 | Hepatitis A (virus)                    | Hepatic (GI)                 |
| HBV                 | Hepatitis B (virus)                    | Hepatic (GI)                 |
| HCV                 | Hepatitis C (virus)                    | Hepatic (GI)                 |
| HTN                 | Hypertension                           | Cardiovascular               |
| HCVD                | Hypertensive cardiovascular disease    | Cardiovascular               |
| IHSS                | Idiopathic hypertrophic subaortic site | Cardiovascular               |
| ITP                 | Idiopathic thrombocytopenia            | Hematologic                  |
| IH                  | Infectious hepatitis                   | Hepatic (GI)                 |
| IBD                 | Inflammatory bowel disease             | Gastrointestinal             |
| IDDM                | Insulin dependent Diabetes Mellitus    | Endocrine                    |
| ILD                 | Interstitial lung disease              | Respiratory                  |
| JRA                 | Juvenile rheumatoid arthritis          | Rheumatologic                |
| KS                  | Kaposi Sarcoma                         |                              |
| LBBS                | Left bundle branch block               | Cardiovascular               |

| <b>Abbreviation</b> | <b>Disease</b>                        | <b>System</b>    |
|---------------------|---------------------------------------|------------------|
| M.S.                | Mitral stenosis                       | Cardiovascular   |
| MVP                 | Mitral valve prolapse                 | Cardiovascular   |
| MCID                | Mixed combined immunodeficiency       | Immune           |
| MCTD                | Mixed connective tissue disease       | Rheumatologic    |
| MAT                 | Multifocal arterial tachycardia       | Cardiovascular   |
| MPVC                | Multifocal premature ventricular cont | Cardiovascular   |
| MS                  | Multiple Sclerosis                    | Neurologic       |
| MM                  | Multiple myeloma                      | Immune           |
| MG                  | Myasthenia Gravis                     | Neurologic       |
| MI                  | Myocardial infarction                 | Cardiovascular   |
| OBS                 | Organic brain syndrome                | Neurologic       |
| PND                 | Paroxysmal Nocturnal Dyspnea          | Cardiovascular   |
| PNH                 | Paroxysmal Nocturnal Hemoglobinur     | Hematologic      |
| PAT                 | Paroxysmal atrial tachycardia         | Cardiovascular   |
| PID                 | Pelvic inflammatory disease           | Reproductive     |
| PUD                 | Peptic ulcer disease                  | Gastrointestinal |
| PVD                 | Peripheral vascular disease           | Cardiovascular   |
| PV                  | Polycythemia Vera                     | Hematologic      |
| PM                  | Polymyositis                          | Rheumatologic    |
| PAC                 | Premature atrial contraction          | Cardiovascular   |
| PSS                 | Progressive systemic sclerosis        | Neurologic       |
| RA                  | Rheumatoid arthritis                  | Rheumatologic    |
| RHD                 | Rheumatic heart disease               | Cardiovascular   |
| RBBB                | Right bundle branch block             | Cardiovascular   |
| SCID                | Severe combined immunodeficiency      | Immune           |
| SSS                 | Sick Sinus syndrome                   | Cardiovascular   |
| SIADH               | Syndrome of inappropriate ADH         | Endocrine        |
| SLE                 | Systemic lupus erythematosus          | Rheumatologic    |
| TTP                 | Thrombotic thrombocytopenic purpur    | Hematologic      |
| TIA                 | Transient ischemic attack             | Neurologic       |
| TB                  | Tuberculosis                          | Respiratory      |
| URI                 | Upper respiratory infection           | Respiratory      |
| UTI                 | Urinary tract infection               | Renal            |
| VSD                 | Ventricular septal defect             | Cardiovascular   |
| WPW                 | Wolff-Parkinson-White syndrome        | Cardiovascular   |

## COMMON ABBREVIATIONS USED ON ABSTRACTS

| <b>A</b>       |                                           |           |                                     |
|----------------|-------------------------------------------|-----------|-------------------------------------|
| A,             | ant, anterior                             | CAD       | coronary artery disease             |
| Abc            | antibiotics                               | CBC       | complete blood count                |
| abd            | abdomen, abdominal                        | CBD       | common bile duct                    |
| ABG            | air/bone gap                              | CC        | chief complaint                     |
| abnl, abn      | abnormal                                  | c/c/e     | clubbing, cyanosis or edema         |
| A.B.P.         | atrial blood pressure                     | C&DB      | cough and deep breathe              |
| abs            | absent                                    | CHD       | congenital heart disease            |
| abx            | antibiotics                               | C.I.S.    | carcinoma in situ                   |
| a.c.           | before meals                              | CLL       | chronic lymphocytic leukemia        |
| adeno CA       | adenocarcinoma                            | CN II-XII | cranial nerves 2-12                 |
| ADH            | antidiuretic hormone                      | CPAP      | continuous positive airway pressure |
| ADL            | activities of daily living                | CPM       | continue present management         |
| adj            | adjacent                                  | Cr        | creatine                            |
| adm            | admission                                 | C-spine   | cervical spine                      |
| A.F. or A. Fib | atrial fibrillation                       | C&S       | culture & sensitivities             |
| AFP            | alpha feto protein                        | CT        | computerized tomography             |
| A. flutter     | atrial flutter                            | c/w       | consistent with                     |
| Ag             | antigen                                   | CXR       | chest x-ray                         |
| AIHA           | autoimmune hemolytic anemia               | cysto     | cystoscopy                          |
| alcoh          | alcohol                                   | cyt       | cytology                            |
| ALL            | acute lymphocytic leukemia                | CT C/A/P  | CT scan of chest, abdomen & pelvis  |
| ALS            | amyotrophic lateral sclerosis             |           | OK to list as CT CAP:               |
| AMA            | against medical advice                    |           |                                     |
| amb            | ambulatory                                | <b>D</b>  |                                     |
| AMI            | acute myocardial infarction               | DC        | discontinued                        |
| amp            | amputation                                | d/c       | discharge                           |
| A/P            | assessment and plan                       | decr      | decrease (d)                        |
| appl'y         | apparently                                | dep       | depression                          |
| arrhy          | arrhythmia                                | diff      | differentiated                      |
| asp            | aspiration                                | D.O.E.    | dyspnea on exertion                 |
| aut            | autopsy                                   | DRE       | digital rectal exam                 |
|                |                                           | D.T.s     | delerium tremens                    |
|                |                                           | dx        | diagnosis                           |
|                |                                           | dz        | disease                             |
| <b>B</b>       |                                           | <b>E</b>  |                                     |
| B              | bilateral                                 | EGD       | esophagogastro-<br>duodenoscopy     |
| BAD            | Bipolar Affective Disorder                | enlgd     | enlarged                            |
| Ba             | barium                                    | ER        | estrogen receptor                   |
| B9             | benign                                    | ERCP      | endoscopic retrograde               |
| BE             | barium enema                              | et        | and                                 |
| BID            | 2 x's a day                               | ETOH      | alcohol                             |
| bil            | bilateral                                 | EUA       | exam under anesthesia               |
| BKA            | below knee amputation                     | exc('d)   | excise(d)                           |
| BM             | bone marrow, bowel movement               | exp lap   | exploratory laparotomy              |
| BP             | blood pressure                            | ext       | extension, extended, extending      |
| BMT            | bone marrow transplant                    |           |                                     |
| BRBPR          | bright red blood per rectum               | <b>F</b>  |                                     |
| BS             | bowel sounds, breath<br>sounds, bone scan | FB        | foreign body                        |
| BSO            | bilateral salpingo-oophorectomy           | ff        | force fluids                        |
| BT             | bladder tumor                             | FH        | family history                      |
| BV             | blood volume                              | FNA       | fine needle aspiration              |
| Bx             | biopsy                                    | FNAB      | fine needle aspiration biopsy       |
|                |                                           | FND       | functional neck dissection          |
| <b>C</b>       |                                           |           |                                     |
| CA             | cancer                                    |           |                                     |
| CABG           | coronary artery bypass graft              |           |                                     |

F/O fiberoptic  
 FOB fiberoptic bronchoscopy  
 FOE fiberoptic exam  
 FOM floor of mouth  
 FROM full range of motion  
 FS frozen section  
 FTSG full thickness skin graft  
 F/U follow up  
 FUO fever of unknown origin  
 Fx fracture

## G

G gravida  
 GB gallbladder  
 GI gastrointestinal  
 Gr grade  
 GSW gunshot wound  
 GT granulation tissue  
 gtt drop  
 gtts drops  
 GU genitourinary

## H

HA headache  
 HCG human chorionic gonadotropin  
 HEENT head, eyes, ears, nose & throat  
 HH hiatal hernia  
 H/O history of  
 HOB head of bed  
 HPI history of present illness  
 HS hours of sleep (at bedtime)  
 HTN hypertension  
 H&P history and physical examination  
 hx history  
 hyst hysterectomy

## I

I & D incision & drainage  
 IHC immunohistochemical  
 IMA internal mammary artery  
 incr increase (d)  
 ing inguinal  
 inv invade(s), invading, nvasion  
 invol involve(s)(ment)(ing)  
 IV intravenous  
 IVC inferior vena cava  
 IVF IV fluids  
 IVP Intravenous pyelogram

## L

L left  
 lat lateral  
 LE lower extremity  
 lg large  
 LIQ lower inner quadrant  
 LLL left lower lobe  
 LLQ left lower quadrant  
 LN lymph node  
 LND lymph node dissection  
 LOQ lower outer quadrant

LP lumbar puncture  
 LS scan  
 L-spine liver/spleen scan  
 LS lumbar spine  
 LUL lumbosacral  
 LUQ left upper lobe  
 LUQ left upper quadrant

## M

malignant  
 mand mandible, mandibular  
 max maximum, maxillary  
 med medial, mediastinoscopy  
 mets metastasis, metastatic  
 MD moderately differentiated  
 mod moderate, moderately  
 MSB main stem bronchus  
 MRI magnetic resonance imaging  
 MRM modified radical mastectomy  
 mult multiple  
 MVA motor vehicle accident

## N

NA not applicable  
 NED no evidence of disease  
 neg negative  
 NER no evidence of recurrence  
 NKDA no known drug allergies  
 nl normal  
 nos not otherwise specified  
 NR not recorded  
 NSF no significant findings  
 N&V nausea & vomiting

## O

obst obstruct (-ing, -ion)  
 OMP other medical problem  
 OSH outside hospital

## P

P post posterior  
 PA pulmonary artery, posterior-anterior  
 palp palpated, palpable  
 P&A percussion & auscultation  
 PE physical examination  
 perc percutaneous  
 PD poorly differentiated  
 pos positive  
 poss possible  
 PMH past medical history  
 PPD packs per day  
 PR progesterone receptor  
 prob probable, probably  
 pt patient  
 PTA prior to admission

## Q

QID 4 x's a day  
 QOD every other day  
 quad quadrant  
 qh every hour

qhs at bedtime  
 q every  
 qd every day

## R

R right  
 RCM right costal margin  
 resec resection, resected  
 RIA radio immune assay  
 RLL right lower lobe  
 RLQ right lower quadrant  
 R/O rule out  
 ROS review of (outside slides)  
 RUL right upper lobe  
 RUQ right upper quadrant  
 RT radiation therapy  
 RND radical neck nessection  
 Rx prescription (or treatment)

## S

SB small bowel  
 SBO small bowel obstruction  
 SCCA squamous cell carcinoma  
 SC(V) supraclavicular  
 sm small  
 SOB shortness of breath  
 S/P status post  
 spec specimen  
 S&S signs and symptoms  
 ST soft tissue  
 STSG split thickness skin graft  
 susp suspicious, suspected  
 SV seminal vesicles  
 SVC superior vena cava  
 Sx symptoms

## T

T thoracic  
 TAH total abdominal hysterectomy  
 TNM T = tumor primary site stage N = nodal stage (regional) M = distant metastasis stage  
 TS tumor size  
 T-spine thoracic spine  
 TVC true vocal cord  
 Tx treatment

## U, V, W,

UE upper extremity  
 UGI upper gastrointestinal  
 undiff undifferentiated  
 unk unknown  
 vag vaginal  
 WD well differentiated  
 wnl within normal limits  
 wt weight  
 w/u work-up

## SYMBOLS

+ plus, positive  
 & and  
 - ess, minus, negative  
 < less than  
 > more or greater than  
 x times  
 # pounds, number  
 @ at  
 w/ with  
 w/o without

## PARTIAL DRUG LIST

| <b>Common Trade Name</b> | <b>Generic Name</b>           | <b>Diseases</b>                                                      |
|--------------------------|-------------------------------|----------------------------------------------------------------------|
| Accolate                 | zafirlukast                   | Prophylaxis, Chronic Treatment of Asthma                             |
| Accupril                 | quinapril                     | Hypertension                                                         |
| Actos                    | pioglitazone                  | Lower Blood Glucose                                                  |
| Achromycin               | tetracycline                  | Treatment of Infections                                              |
| Adalat                   | nifedipine                    | Hypertension                                                         |
| Aerobid                  | flunisolide                   | Asthma                                                               |
| Aldactone                | spironolactone                | Congestive Heart Failure,                                            |
| Altace                   | ramipril                      | Hypertension                                                         |
| Amaryl                   | glimepiride                   | Lower Blood Glucose                                                  |
| Amoxil                   | amoxicillin                   | Treatment of Infections                                              |
| Apresoline               | hydralazine                   | Hypertension                                                         |
| Atacand                  | candesartan                   | Hypertension                                                         |
| Avandia                  | rosiglitazone                 | Lower Blood Glucose                                                  |
| Avapro                   | irbesartan                    | Hypertension                                                         |
| Axid                     | nizatidine                    | Heartburn, Acid Indigestion, Sour Stomach                            |
| Azmacort                 | Triamcinolone acetonide       | Asthma                                                               |
| AZT                      | azathioprine                  | Rejection in Renal Transplantation, Rheumatoid Arthritis             |
| Beclovent                | beclomethasone dipropionate   | Asthma                                                               |
| Biaxin                   | clarithromycin                | Treatment of Infections                                              |
| Brethaire                | terbutaline                   | Reversal of Bronchospasms                                            |
| Bumex                    | bumetanide                    | Edema, Heart Failure, Hepatic & Renal Disease                        |
| Calan                    | verapamil                     | Angina, Arrhythmias                                                  |
| Capoten                  | captopril                     | Hypertension                                                         |
| Carafate                 | sucralfate                    | Duodenal Ulcer                                                       |
| Cardizem                 | diltiazem                     | Hypertension                                                         |
| Celexa                   | citulopram                    | Depression                                                           |
| Combivent                | ipratropium                   | Chronic Obstructive Pulmonary Disease                                |
| Coreg                    | carvedilol                    | Congestive Heart Failure,                                            |
| Covera                   | verapamil                     | Hypertension, Angina                                                 |
| Cozaar                   | losartan                      | Hypertension                                                         |
| Cytotec                  | misoprostol                   | Prevention of NSAID Gastric Ulcers, Concomitant Debilitating Disease |
| Demadix                  | torsemide                     | Edema, Congestive Heart Failure, Renal Disease, Hepatic Disease      |
| Depakote                 | divalproex Sodium delayed-rel | Bipolar Disorder                                                     |
| Desyrel                  | trazadone                     | Depression                                                           |
| Diabinese                | chlorpropamide                | Hyperglycemia, to Lower Blood Glucose                                |
| DiBeta                   | glyburide                     | Lower Blood Glucose                                                  |
| Dilacor                  | diltiazem                     | Hypertension                                                         |
| Diltia                   | diltiazem                     | Hypertension                                                         |
| Diovan                   | valsartan                     | Hypertension                                                         |
| Diuril                   | chlorothiazide                | Hypertension                                                         |
| Effexor XR               | venlafaxine ext-rel           | Depression                                                           |
| Elavil                   | amitriptyline                 | Depression                                                           |
| Flagyl                   | metronidazole                 | symptomatic trichomoniasis                                           |
| Flovent                  | fluticasone propionate        | Asthma                                                               |
| Glucophage               | metformin                     | Lower Blood Glucose                                                  |
| Glucotrol                | glipizide                     | Control Hyperglycemia                                                |
| Glynase                  | glyburide                     | Lower Blood Glucose                                                  |
| Glyset                   | miglitol                      | Lower Blood Glucose                                                  |
| Inderal                  | propranolol                   | HTN, Angina Pectoris, MI., Migraine, Hypertrophic Subaortic Stenosis |
| Intal                    | cromolyn sodium               | Bronchial Asthma                                                     |
| Isoptin                  | verapamil                     | Hypertension                                                         |

| <b>Common Trade Name</b> | <b>Generic Name</b>             | <b>Diseases</b>                                                 |
|--------------------------|---------------------------------|-----------------------------------------------------------------|
| Isordil                  | isosorbide dinitrate            | Angina Pectoris, Coronary Heart Disease                         |
| Lanoxin                  | digoxin                         | Heart Failure, Atrial Fibrillation                              |
| Lasix                    | furosemide                      | Edema, Hypertension                                             |
| Levitol                  | penbutolol                      | Arterial Hypertension                                           |
| Lithium                  | lithium carbonate               | Bipolar Disorder, Manic (DSM-III)                               |
| Lopressor                | metoprolol                      | Hypertension                                                    |
| Lotensin                 | benazepril                      | Hypertension                                                    |
| Maalox Plus              | Magnesium hydrox, alum. hydrox. | Upset Stomach                                                   |
| Maxair                   | pirbuterol                      | Reversal of Bronchospasms                                       |
| Metrogel                 | metronidazole                   | Symptomatic Trichomoniasis                                      |
| Micronase                | glyburide                       | Lower Blood Glucose                                             |
| Monopril                 | fosinopril                      | Hypertension                                                    |
| Mylanta Double Strength  | simethicone antacids            | Acid Indigestion, Sour Stomach                                  |
| Nasalcrom                | sulfasalazine                   | Allergic Rhinitis                                               |
| Norvasc                  | amlodipine                      | Hypertension, Chronic Stable Angina, Vasospastic Angina         |
| Orinase                  | tolbutamide                     | Lower Blood Glucose                                             |
| Pepcid                   | famotidine                      | Duodenal & Benign Gastric Ulcers, Gastroesophageal Reflux       |
| Pepto Bismol             | bismuth subsalicylate           | Upset Stomach & Diarrhea                                        |
| Prandin                  | repaglinide                     | Lower Blood Glucose                                             |
| Precose                  | acarbose                        | Lower Blood Glucose                                             |
| Prilosec                 | omeprazole                      | Duodenal Ulcer                                                  |
| Prinivil                 | lisinopril                      | Hypertension, Heart Failure, Acute Myocardial Infarction        |
| Procardia                | nifedipine                      | Vasospastic Angina, Chronic Stable Angina                       |
| Proventil                | albuterol                       | Bronchospasms, Airway Disease,                                  |
| Prozac                   | fluoxetine                      | Depression                                                      |
| Pulmicort Turbuhaler     | budesonide                      | Asthma                                                          |
| Rezulin                  | troglitazone                    | Lower Blood Glucose                                             |
| Serevent                 | salmeterol                      | Asthma                                                          |
| Slo-Bid Gyrocaps         | theophylline                    | Asthma, Reversible Bronchospasms, Chronic Bronchitis, Emphysema |
| Sorbitrate               |                                 | Angina, Coronary Artery Disease                                 |
| Sular                    | nisoldipine                     | Hypertension                                                    |
| Tagament                 | cimetidine                      | Short Term Duodenal Ulcer                                       |
| Theo-Dur                 | theophylline                    | Chronic Asthma, Chronic Lung Disease, Emphysema                 |
| Tiamate                  | diltiazem                       | Hypertension                                                    |
| Tiazac                   | diltiazem                       | Hypertension                                                    |
| Tilade                   | nedocromil sodium               | Bronchial Asthma                                                |
| Tolinase                 | tolazamide                      | Lower Blood Glucose                                             |
| Tornalate                | bitolterol mesylate             | Bronchial Asthma, Reversible Bronchospasms                      |
| Unidur                   | theophylline                    | Chronic Asthma, Chronic Lung Disease, Emphysema                 |
| Vanceril                 | beclomethasone dipropionate     | Bronchial Asthma                                                |
| Vasotec                  | enalapril                       | Hypertension                                                    |
| Ventolin                 | albuterol                       | Bronchospasms, Airway Disease,                                  |
| Verelan                  | verapamil                       | Hypertension                                                    |
| Wellbutrin               | bupropion                       | Depression                                                      |
| Zantac                   | ranitidine                      | Short Term Duodenal Ulcer, Maintenance of Ulcer, Gastric Ulcer  |
| Zebeta                   | bisoprolol                      | Hypertension                                                    |
| Zestril                  | lisinopril                      | Hypertension, Heart Failure, Acute Myocardial Infarction        |
| Zoloft                   | sertraline                      | Depression                                                      |
| Zyflo                    | zileuton                        | Prophylaxis, Chronic Treatment of Asthma                        |

| <b>Generic Name</b>             | <b>Common Trade Name</b> | <b>Diseases</b>                                           |
|---------------------------------|--------------------------|-----------------------------------------------------------|
| acarbose                        | Precose                  | Lower Blood Glucose                                       |
| albuterol                       | Proventil                | Bronchospasms, Airway Disease,                            |
| albuterol                       | Ventolin                 | Bronchospasms, Airway Disease,                            |
| amitriptyline                   | Elavil                   | Depression                                                |
| amoldipine                      | Norvasc                  | Hypertension, Chronic Stable Angina, Vasospastic Angina   |
| amoxicillin                     | Amoxil                   | Treatment of Infections                                   |
| azathioprine                    | AZT                      | Rejection in Renal Transplantation, Rheumatoid Arthritis  |
| beclomethasone dipropionate     | Beclovent                | Asthma                                                    |
| beclomethasone dipropionate     | Vanceril                 | Bronchial Asthma                                          |
| benazepril                      | Lotensin                 | Hypertension                                              |
| bismuth subsalicylate           | Pepto Bismol             | Upset Stomach & Diarrhea                                  |
| bisoprolol                      | Zebeta                   | Hypertension                                              |
| bitolterol mesylate             | Tornalate                | Bronchial Asthma, Reversible Bronchospasms                |
| budesonide                      | Pulmicort Turbuhaler     | Asthma                                                    |
| bumetanide                      | Bumex                    | Edema, Heart Failure, Hepatic & Renal Disease             |
| bupropion                       | Wellbutrin               | Depression                                                |
| candesartan                     | Atacand                  | Hypertension                                              |
| captopril                       | Capoten                  | Hypertension                                              |
| carvedilol                      | Coreg                    | Congestive Heart Failure,                                 |
| chlorothiazide                  | Diuril                   | Hypertension                                              |
| chlorpropamide                  | Diabinese                | Hyperglycemia, to Lower Blood Glucose                     |
| cimetidine                      | Tagament                 | Short Term Duodenal Ulcer                                 |
| citulopram                      | Celexa                   | Depression                                                |
| clarithromycin                  | Biaxin                   | Treatment of Infections                                   |
| cromolyn sodium                 | Intal                    | Bronchial Asthma                                          |
| digoxin                         | Lanoxin                  | Heart Failure, Atrial Fibrillation                        |
| diltiazem                       | Cardizem                 | Hypertension                                              |
| diltiazem                       | Dilacor                  | Hypertension                                              |
| diltiazem                       | Diltia                   | Hypertension                                              |
| diltiazem                       | Tiamate                  | Hypertension                                              |
| diltiazem                       | Tiazac                   | Hypertension                                              |
| divalproex Sodium delayed-rel   | Depakote                 | Bipolar Disorder                                          |
| enalapril                       | Vasotec                  | Hypertension                                              |
| famotidine                      | Pepcid                   | Duodenal & Benign Gastric Ulcers, Gastroesophageal Reflux |
| flunisolide                     | Aerobid                  | Asthma                                                    |
| fluoxetine                      | Prozac                   | Depression                                                |
| fluticasone propionate          | Flovent                  | Asthma                                                    |
| fosinopril                      | Monopril                 | Hypertension                                              |
| furosemide                      | Lasix                    | Edema, Hypertension                                       |
| glimepiride                     | Amaryl                   | Lower Blood Glucose                                       |
| glipizide                       | Glucotrol                | Control Hyperglycemia                                     |
| glyburide                       | DiBeta                   | Lower Blood Glucose                                       |
| glyburide                       | Glynase                  | Lower Blood Glucose                                       |
| glyburide                       | Micronase                | Lower Blood Glucose                                       |
| hydralazine                     | Apresoline               | Hypertension                                              |
| ipratropium                     | Combivent                | Chronic Obstructive Pulmonary Disease                     |
| irbesartan                      | Avapro                   | Hypertension                                              |
| isosorbide dinitrate            | Isordil                  | Angina Pectoris, Coronary Heart Disease                   |
| lisinopril                      | Prinivil                 | Hypertension, Heart Failure, Acute Myocardial Infarction  |
| lisinopril                      | Zestril                  | Hypertension, Heart Failure, Acute Myocardial Infarction  |
| lithium carbonate               | Lithium                  | Bipolar Disorder, Manic (DSM-III)                         |
| losartan                        | Cozaar                   | Hypertension                                              |
| Magnesium hydrox, alum. hydrox. | Maalox Plus              | Upset Stomach                                             |



| <b>Generic Name</b>     | <b>Common Trade Name</b> | <b>Diseases</b>                                                      |
|-------------------------|--------------------------|----------------------------------------------------------------------|
| metformin               | Glucophage               | Lower Blood Glucose                                                  |
| metoprolol              | Lopressor                | Hypertension                                                         |
| metronidazole           | Flagyl                   | symptomatic trichomoniasis                                           |
| miglitol                | Glyset                   | Lower Blood Glucose                                                  |
| misoprostol             | Cytotec                  | Prevention of NSAID Gastric Ulcers, Concomitant Debilitating Disease |
| nedocromil sodium       | Tilade                   | Bronchial Asthma                                                     |
| nifedipine              | Adalat                   | Hypertension                                                         |
| nifedipine              | Procardia                | Vasospastic Angina, Chronic Stable Angina                            |
| nisoldipine             | Sular                    | Hypertension                                                         |
| nizatidine              | Axid                     | Heartburn, Acid Indigestion, Sour Stomach                            |
| nortriptyline           | pamalar                  | Endogenous Depression                                                |
| omeprazole              | Prilosec                 | Duodenal Ulcer                                                       |
| penbutolol              | Levitol                  | Arterial Hypertension                                                |
| pioglitazone            | Actos                    | Lower Blood Glucose                                                  |
| pirbuterol              | Maxair                   | Reversal of Bronchospasms                                            |
| propranolol             | Inderal                  | HTN, Angina Pectoris, MI., Migraine, Hypertrophic Subaortic Stenosis |
| quinapril               | Accupril                 | Hypertension                                                         |
| ramipril                | Altace                   | Hypertension                                                         |
| ranitidine              | Zantac                   | Short Term Duodenal Ulcer, Maintenance of Ulcer, Gastric Ulcer       |
| repaglinide             | Prandin                  | Lower Blood Glucose                                                  |
| rosiglitazone           | Avandia                  | Lower Blood Glucose                                                  |
| salmeterol              | Serevent                 | Asthma                                                               |
| sertraline              | Zoloft                   | Depression                                                           |
| simethicone antacids    | Mylanta Double Strength  | Acid Indigestion, Sour Stomach                                       |
| spironolactone          | Aldactone                | Congestive Heart Failure,                                            |
| sucralfate              | Carafate                 | Duodenal Ulcer                                                       |
| sulfasalazine           | Nasalcrom                | Allergic Rhinitis                                                    |
| terbutaline             | Brethaire                | Reversal of Bronchospasms                                            |
| tetracycline            | Achromycin               | Treatment of Infections                                              |
| theophylline            | Slo-Bid Gyrocaps         | Asthma, Reversible Bronchospasms, Chronic Bronchitis, Emphysema      |
| theophylline            | Theo-Dur                 | Chronic Asthma, Chronic Lung Disease, Emphysema                      |
| theophylline            | Unidur                   | Chronic Asthma, Chronic Lung Disease, Emphysema                      |
| tolazamide              | Tolinase                 | Lower Blood Glucose                                                  |
| tolbutamide             | Orinase                  | Lower Blood Glucose                                                  |
| toremide                | Demadix                  | Edema, Congestive Heart Failure, Renal Disease, Hepatic Disease      |
| trazadone               | Desyrel                  | Depression                                                           |
| Triamcinolone acetonide | Azmacort                 | Asthma                                                               |
| trogliatone             | Rezulin                  | Lower Blood Glucose                                                  |
| valsartan               | Diovan                   | Hypertension                                                         |
| venlafaxine ext-rel     | Effexor XR               | Depression                                                           |
| verapamil               | Calan                    | Angina, Arrhythmias                                                  |
| verapamil               | Covera                   | Hypertension, Angina                                                 |
| verapamil               | Isoptin                  | Hypertension                                                         |
| verapamil               | Verelan                  | Hypertension                                                         |
| zafirlukast             | Accolate                 | Prophylaxis, Chronic Treatment of Asthma                             |
| zileuton                | Zyflo                    | Prophylaxis, Chronic Treatment of Asthma                             |
|                         | Sorbitrate               | Angina, Coronary Artery Disease                                      |
